# Supplementary material
Source: Research Square preprint supplement (doi:10.21203/rs.3.rs-10105880/v1)
Supplement: Supplementary file 1 [file b04b42649fdd9a6b4403bf15.pdf]

# Supporting Information

## Mechanism by which Nitrous Oxide Enables Continuous Methane Hydroxylation on Fe-CHA Zeolites

Daniel C. Cano-Blanco<sup>1,2</sup>, Jailyn George<sup>3</sup>, Jörg. W. A. Fischer<sup>4,5</sup>, Zequan Li<sup>1,2</sup>, Gabriela-Teodora Dutcă<sup>1,2</sup>, Daniele Bonavia<sup>6</sup>, Adam H. Clark<sup>6</sup>, Maarten Nachtegaal<sup>1,6,7</sup>, Wenshuo Hu<sup>3\*</sup>, Oliver Kröcher<sup>1,2</sup>, Davide Ferri<sup>1\*</sup>

<sup>1</sup> PSI Center for Energy and Environmental Sciences, Paul Scherrer Institute, CH-5232 Villigen PSI, Switzerland

<sup>2</sup> Institute of Chemical and Bioengineering, École polytechnique fédérale de Lausanne (EPFL), CH-1015 Lausanne, Switzerland

<sup>3</sup> Department of Chemical Engineering, Edward E. Whitacre Jr. College of Engineering, Texas Tech University, Lubbock, TX 79409, United States

<sup>4</sup> Institute for Molecular Physical Science, ETH Zurich, Vladimir-Prelog-Weg 1–5/10, 8093 Zurich, Switzerland

<sup>5</sup> Inorganic Chemistry and Catalysis, Debye Institute for Nanomaterials Science and Institute for Sustainable and Circular Chemistry, Faculty of Science, Utrecht University, Utrecht, The Netherlands

<sup>6</sup> PSI Center for Photon Science, Paul Scherrer Institute, CH-5232 Villigen PSI, Switzerland

<sup>7</sup> Institute for Inorganic Chemistry, ETH Zurich, Vladimir-Prelog-Weg 1–5/10, 8093 Zurich, Switzerland

\* Corresponding authors

[wenshuo.hu@ttu.edu](mailto:wenshuo.hu@ttu.edu) (W. Hu); [davide.ferri@psi.ch](mailto:davide.ferri@psi.ch) (D. Ferri)

|    |                                                                                         |    |
|----|-----------------------------------------------------------------------------------------|----|
| 3  | <b>Table of Contents</b>                                                                |    |
| 4  | Supplementary Note 1: Pre-edge Subtraction and Analysis from Fe K $\alpha$ HERFD-       |    |
| 5  | XANES.....                                                                              | 3  |
| 6  | Supplementary Note 2: Multivariate Curve Resolution (MCR) Analysis.....                 | 5  |
| 7  | Supplementary Note 3: Additional Details on Density Functional Theory Calculations..... | 6  |
| 8  | Supplementary Tables.....                                                               | 8  |
| 9  | Supplementary Figures.....                                                              | 13 |
| 10 | Supplementary References.....                                                           | 39 |
| 11 |                                                                                         |    |

## 12 **Supplementary Note 1**

### 13 **Pre-edge subtraction and analysis from Fe K $\alpha$ HERFD-XANES**

14 In analogy to Wilke et al.<sup>1</sup> and Boubnov et al.<sup>2</sup>, the enhanced spectral resolution provided by  
15 Fe K $\alpha$  high-energy-resolution fluorescence-detected XANES (HERFD-XANES) was  
16 exploited to extract quantitative information from the pre-edge region. To isolate the pre-edge  
17 contribution, the background was modeled and subtracted using an arctangent function  
18 describing the absorption edge:

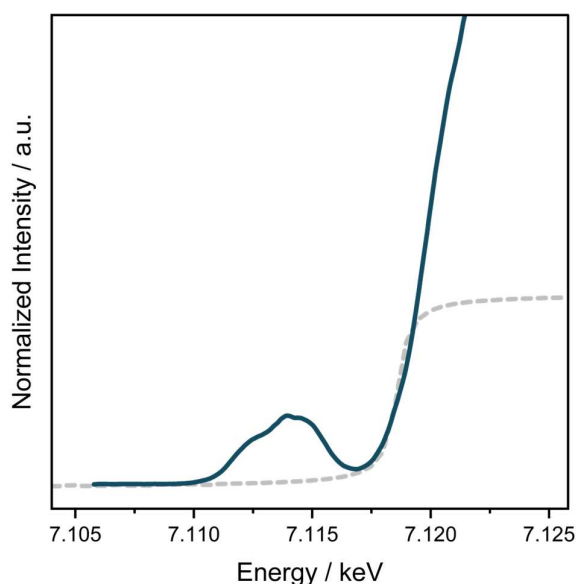

19

20 **Pre-edge subtraction from Fe K $\alpha$  HERFD-XANES.** The experimental spectrum (solid  
21 curve) is modeled with an arctangent function describing the absorption edge (dashed curve).

22

23 The resulting pre-edge feature was then fitted using a sum of Gaussian functions, and the  
24 number of components was chosen to obtain an optimal description of the experimental data.  
25 From both the raw and fitted pre-edge, the integrated pre-edge intensity was determined from  
26 the peak area, and the centroid position was calculated. Reference compounds with well-  
27 defined Fe oxidation states and coordination environments were used for calibration of the

28 centroid position analysis:  $\text{FePO}_4 \cdot 2\text{H}_2\text{O}$  ( $\text{Fe}^{3+}$ , octahedral),  $\text{Fe}_2\text{O}_3$  ( $\text{Fe}^{3+}$ , octahedral),  $\text{FePO}_4$   
29 ( $\text{Fe}^{3+}$ , tetrahedral), and  $\text{FeSO}_4 \cdot 7\text{H}_2\text{O}$  ( $\text{Fe}^{2+}$ , octahedral). The pre-edge analysis enables a  
30 quantitative estimation of the average Fe redox state, leveraging the linear relationship between  
31 the centroid position and the oxidation state.<sup>3</sup>

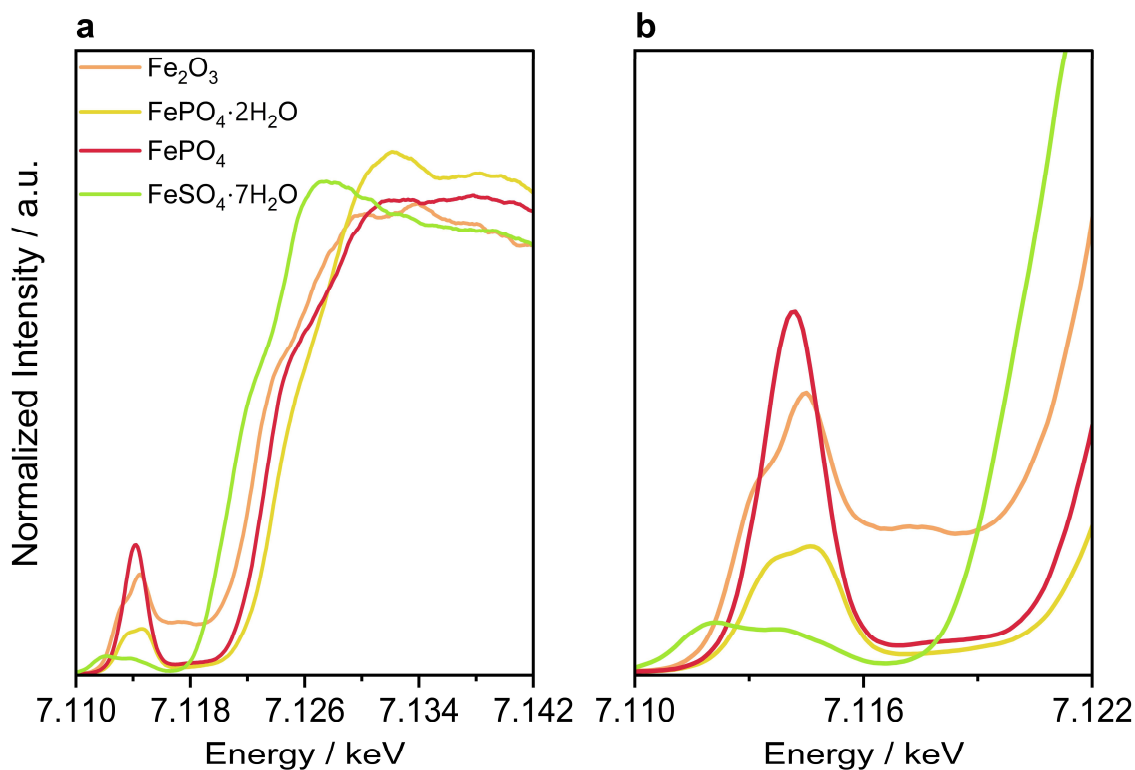

32  
33 **Fe K $\alpha$  HERFD-XANES reference spectra used for pre-edge calibration. a**, Normalized  
34 HERFD-XANES of  $\text{FePO}_4 \cdot 2\text{H}_2\text{O}$  ( $\text{Fe}^{3+}$ , octahedral),  $\text{Fe}_2\text{O}_3$  ( $\text{Fe}^{3+}$ , octahedral),  $\text{FePO}_4$  ( $\text{Fe}^{3+}$ ,  
35 tetrahedral), and  $\text{FeSO}_4 \cdot 7\text{H}_2\text{O}$  ( $\text{Fe}^{2+}$ , octahedral). **b**, Magnified view of the pre-edge region.

36

37 It is important to emphasize that pre-edge analysis alone cannot unambiguously determine the  
38 coordination geometry of  $\text{Fe}^{2+}$  and  $\text{Fe}^{3+}$ , particularly when the system deviates from ideal sym-  
39 metries. This limitation is especially relevant for Fe sites in zeolites, where a range of local  
40 environments can arise due to varying anchoring sites and degrees of speciation.<sup>3</sup>

## 41 **Supplementary Note 2**

### 42 **Multivariate curve resolution (MCR)**

43 Applying the multivariate curve resolution-alternating least squares (MCR-ALS) method to  
44 decompose the time-resolved *operando* XANES data of Fe-CHA, three significant components  
45 (**Fig. 6g**; lack of fit presented in **Supplementary Figure 23**) associated with Fe centers were  
46 identified over the whole reaction protocol and captured most of the signal variance: an  
47 oxidized component formed upon contact with N<sub>2</sub>O (Component 1), and two reduced  
48 components (Components 2 and 3) observed under CH<sub>4</sub> and N<sub>2</sub>O+CH<sub>4</sub>. The absorption edge  
49 energies of these components, determined at a normalized intensity of 0.9, were correlated with  
50 the formal Fe oxidation-state analysis reported in **Supplementary Figure 6**, following an  
51 approach analogous to previous studies.<sup>4, 5</sup> The linear correlation between edge energy and  
52 average oxidation state was derived from Fe<sup>2+</sup> and Fe<sup>3+</sup> reference compounds, yielding average  
53 oxidation states of 2.9 for Component 1, 2.2 for Component 2, and 2.1 for Component 3.

54 Accordingly, Component 1 is assigned predominantly to Fe<sup>3+</sup> species in Fe-CHA, whereas  
55 Components 2 and 3 are assigned predominantly to Fe<sup>2+</sup> species. The latter two components  
56 differ mainly in the local coordination environment of Fe, as indicated by the feature at  
57 7.120 keV in Component 2, which is characteristic of square-planar Fe<sup>2+</sup> species, as discussed  
58 in the main text. Since the kinetic analysis focused on the evolution of Fe oxidation states,  
59 Components 2 and 3 were combined into a single contribution representative of Fe<sup>2+</sup> species  
60 for the analysis shown in **Fig. 6h**.

61

62

63

## 64 **Supplementary Note 3**

### 65 **Additional details on density functional theory calculations**

66 Hexagonal CHA unit cells containing 36 tetrahedral (T) sites were taken from the International  
67 Zeolite Association (IZA) database (13.675×13.675×14.767, unit: Å)<sup>6</sup> and used to model the  
68 CHA framework studied in the present work. Two Si atoms within the same six-membered ring  
69 (6MR), separated by two intervening T sites, were substituted by Al (denoted Z<sub>2</sub>, where Z  
70 indicates CHA and “2” denotes two Al atoms per unit cell), giving a Si/Al ratio of 17/1,  
71 comparable to that of the CHA catalysts used experimentally. This Al arrangement stabilizes  
72 isolated Fe<sup>2+</sup> cations in a square-planar coordination environment (Z<sub>2</sub>Fe<sup>2+</sup>, **Supplementary**  
73 **Fig. 26a**), which is energetically preferred<sup>7, 8</sup> and consistent with the spectroscopic evidence  
74 reported in the main text.

75 Periodic, spin-polarized DFT calculations were performed with the *Vienna Ab initio Simulation*  
76 *Package* (VASP 6.5.1)<sup>9, 10</sup> and the projector-augmented wave (PAW) method, using a plane-  
77 wave cutoff of 400 eV. Geometries were first relaxed with the Perdew–Burke–Ernzerhof  
78 (PBE)<sup>11</sup> functional, including a Hubbard correction ( $U= 3$  eV) on Fe<sup>12</sup> within the Dudarev  
79 scheme<sup>13</sup> (PBE+ $U$ ); they were then refined using the hybrid Heyd–Scuseria–Ernzerhof  
80 (HSE)<sup>14, 15, 16</sup> functional, with the fraction of Hartree–Fock exchange set to 0.15, following  
81 prior calibrations for Fe-containing systems.<sup>12, 17</sup> In both stages, dispersive corrections by DFT-  
82 D3 with Becke–Johnson (BJ) damping<sup>18, 19</sup> were applied. Total energies and forces were  
83 converged to 10<sup>-6</sup> eV and 0.03 eV·Å<sup>-1</sup>, respectively, with the first Brillouin zone sampled at  
84 the  $\Gamma$ -point. The partial charges of Fe were obtained from Bader analysis<sup>20, 21, 22</sup> and normalized  
85 against Fe<sup>2+</sup> and Fe<sup>3+</sup> reference structures to estimate effective oxidation states. The Fe<sup>2+</sup>  
86 reference is Z<sub>2</sub>Fe<sup>2+</sup> (**Supplementary Fig. 26a**), in which Fe compensates the two framework  
87 negative charges introduced by two Al substitutions; the Fe<sup>3+</sup> reference is Z<sub>2</sub>Fe<sup>3+</sup>OH

88 (Supplementary Fig. 26b), in which Fe additionally compensates the negative charge  
89 associated with the hydroxyl group.<sup>17</sup>

90 Vibrational frequencies were computed for the PBE+*U* (+ D3-BJ) optimized structures at the  
91 same level of theory using the finite-difference method with a displacement of 0.015 Å. The  
92 resulting frequencies were used to obtain zero-point vibrational energies (ZPE) and to derive  
93 enthalpies (H), entropies (S), and free energies (G) according to:<sup>23</sup>

$$H = E_0 + \text{ZPE} + H_{\text{trans}} + H_{\text{rot}} + H_{\text{vib}} \quad (\text{S1})$$

$$G = H - T \cdot \left[ \frac{2}{3} \cdot (S_{\text{trans}}^{\text{gas}} + S_{\text{rot}}^{\text{gas}}) + S_{\text{vib}}^{\text{zeo}} \right] \quad (\text{S2})$$

94 Here,  $E_0$  is the DFT-calculated electronic energy (including dispersion). The subscripts “trans”,  
95 “rot”, and “vib” denote translational, rotational, and vibrational contributions derived from  
96 standard statistical mechanics formalisms.<sup>24</sup> Low-frequency modes often correspond to  
97 frustrated translations/rotations of the zeolite-confined species or framework and can  
98 disproportionately affect entropy estimates ( $S_{\text{vib}}^{\text{zeo}}$ ). Therefore, frequencies below 100 cm<sup>-1</sup> were  
99 set to 100 cm<sup>-1</sup>, except for modes corresponding to motion along the reaction coordinate for  
100 transition states.<sup>25, 26</sup> For mobile molecules confined within the CHA cages (e.g., N<sub>2</sub>O, CH<sub>4</sub>,  
101 CH<sub>3</sub>OH, and N<sub>2</sub>), partial translational and rotational freedom was retained by approximating  
102 these contributions as 2/3 of the corresponding gas-phase entropies ( $S_{\text{trans}}^{\text{gas}}$  and  $S_{\text{rot}}^{\text{gas}}$ , Eq. S2),  
103 consistent with prior theoretical treatments of CHA under comparable conditions.<sup>23, 27, 28, 29</sup>

104 Transition states were initially located using the nudged elastic band (NEB) method<sup>30</sup> at the  
105 PBE+*U* (+ D3-BJ) level, with total energies converged to 10<sup>-6</sup> eV and atomic forces below  
106 0.03 eV·Å<sup>-1</sup>; they were then refined at the HSE level using the Dimer method<sup>31</sup> to the same  
107 convergence criteria. Transition states were confirmed by the detection of one imaginary  
108 frequency corresponding to the vibration along the reaction coordinate.

109 **Supplementary Tables**

110 **Supplementary Table 1.** Summary of reported catalytic performance for continuous N<sub>2</sub>O-  
 111 assisted CH<sub>4</sub> hydroxylation, including catalyst composition, reaction conditions, and reported  
 112 oxygenate selectivity and formation rates.<sup>a</sup>

| <b>Catalyst</b>                           | $r_{\text{MeOH+DME}}^{\text{b}}$<br>/ $\mu\text{mol min}^{-1} \text{g}_{\text{Fe}}^{-1}$ | $S_{\text{MeOH+DME}}^{\text{c}}$<br>/ % | <b>Conditions</b>                                                                                                                                | <b>Ref.</b> |
|-------------------------------------------|------------------------------------------------------------------------------------------|-----------------------------------------|--------------------------------------------------------------------------------------------------------------------------------------------------|-------------|
| <b>Fe-CHA</b><br>(0.4%wt Fe)              | 274.4                                                                                    | 92                                      | 275 °C, 0.5%vol N <sub>2</sub> O,<br>1%vol CH <sub>4</sub> , Ar bal.,<br>60 mL min <sup>-1</sup> ,<br>m <sub>cat</sub> = 190 mg                  | this study  |
| <b>Fe-AEI</b><br>(1.5%wt Fe)              | 267                                                                                      | 85                                      | 250 °C,<br>CH <sub>4</sub> /N <sub>2</sub> O/H <sub>2</sub> O/Ar =<br>10:10:2:3,<br>25 mL min <sup>-1</sup> ,<br>m <sub>cat</sub> = 100 mg       | 32          |
| <b>Fe-MOR<sup>d</sup></b><br>(1.9 wt%)    | 301.2                                                                                    | 25                                      | 300 °C, CH <sub>4</sub> /N <sub>2</sub> O/H <sub>2</sub> O<br>= 30:10:11-18, He bal.,<br>100 mL min <sup>-1</sup> ,<br>m <sub>cat</sub> = 300 mg | 33          |
| <b>Fe-SSZ-13<sup>d</sup></b><br>(1.4 wt%) | 76.2                                                                                     | 18                                      |                                                                                                                                                  |             |
| <b>Fe-SSZ-39<sup>d</sup></b><br>(1.6 wt%) | 107.3                                                                                    | 6                                       | 270 °C, CH <sub>4</sub> /N <sub>2</sub> O/H <sub>2</sub> O<br>= 30:30:3, He bal.,<br>50 mL min <sup>-1</sup> ,<br>m <sub>cat</sub> = 300 mg      | 33          |
| <b>Fe-FER<sup>d</sup></b><br>(1.5 wt%)    | 424.4                                                                                    | 54                                      |                                                                                                                                                  |             |
| <b>Fe-ZSM-5<sup>d</sup></b><br>(0.75 wt%) | 313.3                                                                                    | 26                                      |                                                                                                                                                  |             |

113

114

115

## 116 Supplementary Table 1, continued.

| Catalyst                                 | $r_{\text{MeOH+DME}}^{\text{b}}$<br>/ $\mu\text{mol min}^{-1}$<br>$\text{g}_{\text{Fe}}^{-1}$ | $S_{\text{MeOH+DME}}^{\text{c}}$<br>/ % | Conditions                                                                                                                          | Ref. |
|------------------------------------------|-----------------------------------------------------------------------------------------------|-----------------------------------------|-------------------------------------------------------------------------------------------------------------------------------------|------|
| <b>Fe-FER<sup>d</sup></b><br>(0.5 wt%)   | -                                                                                             | 20                                      | 350 °C,<br>CH <sub>4</sub> /N <sub>2</sub> O/He =                                                                                   | 34   |
| <b>Fe-ZSM-5<sup>d</sup></b><br>(0.5 wt%) | -                                                                                             | 4                                       | 28:7:65, He<br>bal.,                                                                                                                |      |
| <b>Fe-Beta<sup>d</sup></b><br>(0.5 wt%)  | -                                                                                             | 5                                       | 70 mL min <sup>-1</sup> ,<br>m <sub>cat</sub> = 200 mg                                                                              |      |
| <b>Fe-ZSM-5<sup>d</sup></b><br>(2 wt%)   | 15.6                                                                                          | 18.3                                    | 300 °C, 2%vol<br>N <sub>2</sub> O, 20%vol<br>CH <sub>4</sub> , Ar bal., 55<br>mL min <sup>-1</sup> ,<br>m <sub>cat</sub> = 440 mg   | 35   |
| <b>Fe-ZSM-5<sup>d</sup></b><br>(2 wt%)   | -                                                                                             | 1.9                                     | 300 °C,<br>CH <sub>4</sub> /N <sub>2</sub> O/He =<br>20:2:78, He<br>bal., 30<br>mL min <sup>-1</sup> ,<br>m <sub>cat</sub> = 360 mg | 36   |

117 <sup>a</sup> Literature data, as published, has been re-calculated in terms of mass-intrinsic activity.118 <sup>b</sup> reaction rate.119 <sup>c</sup> Selectivity.120 <sup>d</sup> Selectivity and formation rate refer to MeOH only.

121

122

123 **Supplementary Table 2.** Summary of steady-state continuous N<sub>2</sub>O-assisted CH<sub>4</sub> oxidation  
124 over Fe-CHA.

| Temperature<br>/ °C | Conversion / %   |                 | Rates / $\mu\text{mol min}^{-1} \text{g}_{\text{Fe}}^{-1}$ |                 |        |              |
|---------------------|------------------|-----------------|------------------------------------------------------------|-----------------|--------|--------------|
|                     | N <sub>2</sub> O | CH <sub>4</sub> | N <sub>2</sub> O                                           | CH <sub>4</sub> | MeOH   | MeOH<br>+DME |
| <b>275</b>          | 2.44             | 1.02            | 416.18                                                     | 298.48          | 41.98  | 274.37       |
| <b>300</b>          | 6.13             | 3.07            | 1038.97                                                    | 905.32          | 80.56  | 539.04       |
| <b>325</b>          | 22.42            | 7.28            | 3798.18                                                    | 2145.11         | 277.57 | 1200.86      |
| <b>350</b>          | 45.21            | 13.37           | 7659.01                                                    | 3936.54         | 532.15 | 1484.52      |

125

126

127 **Supplementary Table 3.** Summary of reaction conditions used in each *operando* spectroscopic  
 128 measurement, including flow rate, gas concentration, temperature, and catalyst mass.

|                                           | <b>XAS</b>                                                                | <b>HERFD</b> | <b>DRIFTS</b> | <b>EPR</b> |
|-------------------------------------------|---------------------------------------------------------------------------|--------------|---------------|------------|
| <b>Catalyst mass</b><br><b>(mg)</b>       | 39.6                                                                      | 40.3         | 30.7          | 14.2       |
| <b>Temperature</b><br><b>(°C)</b>         | 275                                                                       |              |               |            |
| <b>Flow</b><br><b>mL min<sup>-1</sup></b> | 60                                                                        | 60           | 60            | 10         |
| <b>Gas</b><br><b>Concentrations</b>       | 1 vol% N <sub>2</sub> O, Ar balance → 2 vol% CH <sub>4</sub> , Ar balance |              |               |            |
| <b>Stepwise</b><br><b>protocol</b>        |                                                                           |              |               |            |
| <b>Gas</b><br><b>Concentrations</b>       | 0.5 vol% N <sub>2</sub> O, 1 vol% CH <sub>4</sub> , Ar balance            |              |               |            |
| <b>Co-feeding</b><br><b>protocol</b>      |                                                                           |              |               |            |

129

130

131 **Supplementary Table 4.** Summary of measurement parameters for HERFD-XAS, XAS, EPR,  
 132 and DRIFTS, together with the modulation-excitation frequency and pulse sequence applied in  
 133 the ME experiments.

| <b>ME Experiment</b>               |                             | <b>N<sub>2</sub>O vs CH<sub>4</sub></b><br>with constant Ar flow | <b>CH<sub>4</sub> vs Ar</b><br>with constant N <sub>2</sub> O flow |
|------------------------------------|-----------------------------|------------------------------------------------------------------|--------------------------------------------------------------------|
| <b>Conc. N<sub>2</sub>O / vol%</b> |                             | 1 vs 0                                                           | 0.5                                                                |
| <b>Conc. CH<sub>4</sub> / vol%</b> |                             | 0 vs 2                                                           | 1 vs 0                                                             |
| <b>Temperature / °C</b>            |                             | 275                                                              |                                                                    |
| <b>K<math>\alpha</math>-HERFD</b>  | Half-cycle time / min       | 10                                                               |                                                                    |
|                                    | Number of cycles / -        | 12                                                               |                                                                    |
|                                    | Time spectrum / s           | 20                                                               |                                                                    |
|                                    | 7.105 – 7.130 keV           |                                                                  |                                                                    |
| <b>K<math>\beta</math>-HERFD</b>   | Half-cycle time / min       | 10                                                               |                                                                    |
|                                    | Number of cycles / -        | 12                                                               |                                                                    |
|                                    | Time spectrum / s           | 45                                                               |                                                                    |
|                                    | 7.100 – 7.150 keV           |                                                                  |                                                                    |
| <b>EPR<sup>a</sup></b>             | Half-cycle time / min       | 10                                                               |                                                                    |
|                                    | Number of cycles / -        | 12                                                               |                                                                    |
|                                    | Time spectrum / s           | 61                                                               |                                                                    |
|                                    | 50 – 400 mT                 |                                                                  |                                                                    |
| <b>DRIFTS</b>                      | Half-cycle time / min       | 10                                                               |                                                                    |
|                                    | Number of cycles / -        | 8                                                                |                                                                    |
|                                    | Time spectrum / s           | 7.5                                                              |                                                                    |
|                                    | 4000 – 800 cm <sup>-1</sup> |                                                                  |                                                                    |

134

## 135 **Supplementary Figures**

136 **Supplementary Figure 1.** *Ex situ* spectroscopic results of Fe-CHA: Diffuse-reflectance UV-  
137 vis (DRUV), EPR, and Fe K-edge XANES spectra collected at ambient conditions for Fe-CHA.

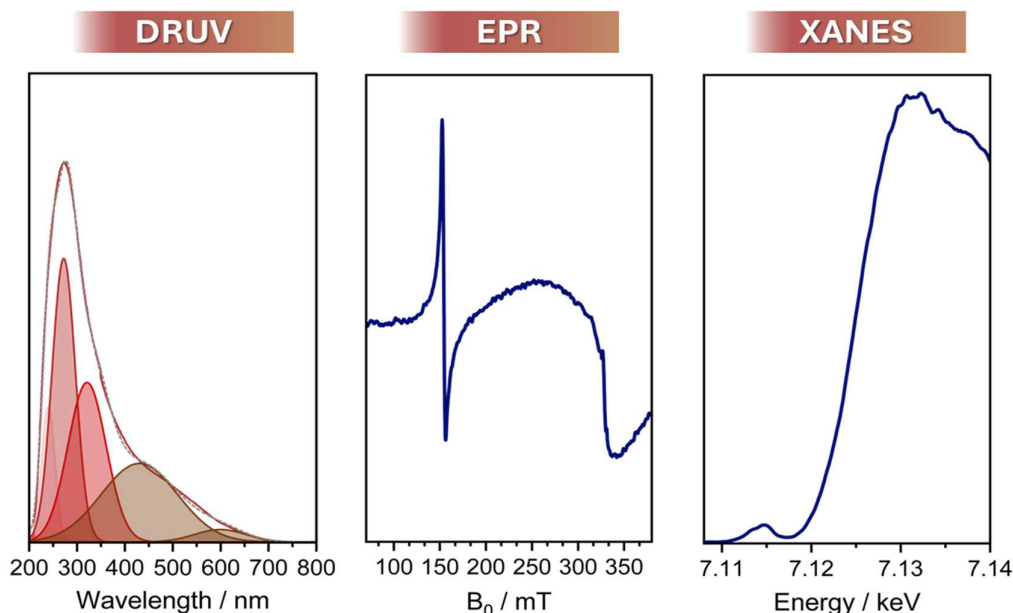

138

139 As previously reported,<sup>37</sup> the DRUV spectra were dominated by ligand-to-metal charge-  
140 transfer (LMCT) transitions associated with several Fe species: (i) tetrahedrally coordinated,  
141 isolated Fe<sup>3+</sup> species within the zeolite framework (Td, 200-250 nm); (ii) extra-framework Fe<sup>3+</sup>  
142 species, possibly in octahedral coordination (Oh, 250-300 nm); (iii) oligomeric extra-  
143 framework Fe<sup>3+</sup> species confined within the zeolite pores (Fe<sub>x</sub>O<sub>y</sub>, 400-450 nm); and (iv) iron  
144 oxide particles located on the external surface of the zeolite (around 550-650 nm).

145 The EPR spectrum mainly revealed two types of Fe species: 1) resonances at  $g' \approx 4.3$  and  $g' \approx$   
146  $8.8$  assigned to Fe centers located either in framework positions or at extra-framework sites; 2)  
147 the broad signal at  $g' \approx 2$  attributed either to small Fe-oxide clusters (Fe<sub>x</sub>O<sub>y</sub>) or to highly  
148 symmetric isolated Fe<sup>3+</sup> species.<sup>37, 38</sup>

149 The XANES spectrum is characterized by a pre-edge feature at 7.114 keV, typical of Fe<sup>3+</sup>  
150 species, together with a shoulder at 7.112 keV, indicative of the co-presence of Fe<sup>2+</sup> species.

151 **Supplementary Figure 2.**  $\text{N}_2\text{O}$  consumption rate ( $r_{\text{N}_2\text{O}}$ ),  $\text{CH}_4$  consumption rate ( $r_{\text{CH}_4}$ ), and  
152 total oxygenate formation rate ( $r_{\text{MeOH+DME}}$ ) as a function of temperature after exposing  
153 Fe-CHA to 1%  $\text{N}_2\text{O}$  for 30 min, followed by 30 min of 2%  $\text{CH}_4$ .

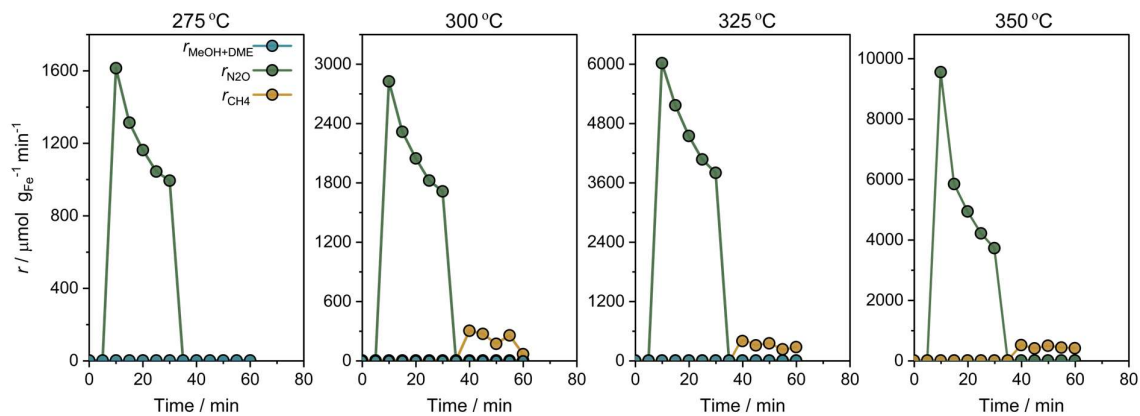

154

155

156 **Supplementary Figure 3.**  $\text{N}_2\text{O}$  consumption rate ( $r_{\text{N}_2\text{O}}$ ),  $\text{CH}_4$  consumption rate ( $r_{\text{CH}_4}$ ), and  
157 total oxygenate formation rate ( $r_{\text{MeOH+DME}}$ ) as a function of temperature during continuous  
158 exposure of Fe-CHA to a 0.5%  $\text{N}_2\text{O}$  + 1%  $\text{CH}_4$  mixture for 130 min. Solid curves are shown  
159 to guide the eye.

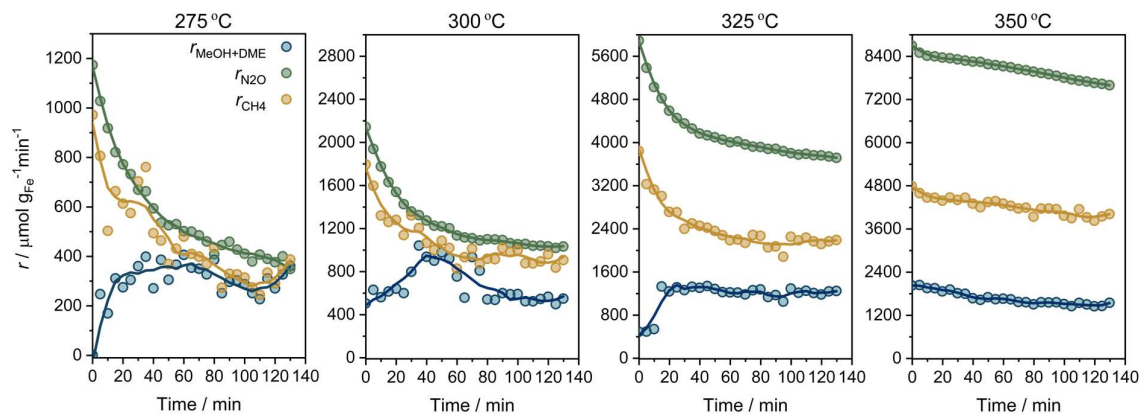

160

161

162

163

164 **Supplementary Figure 4.** Time-on-stream evolution of carbon-based product selectivity  
165 towards methanol (MeOH), dimethyl ether (DME), ethylene ( $C_2H_4$ ), and  $CO_2$  at the indicated  
166 temperatures.

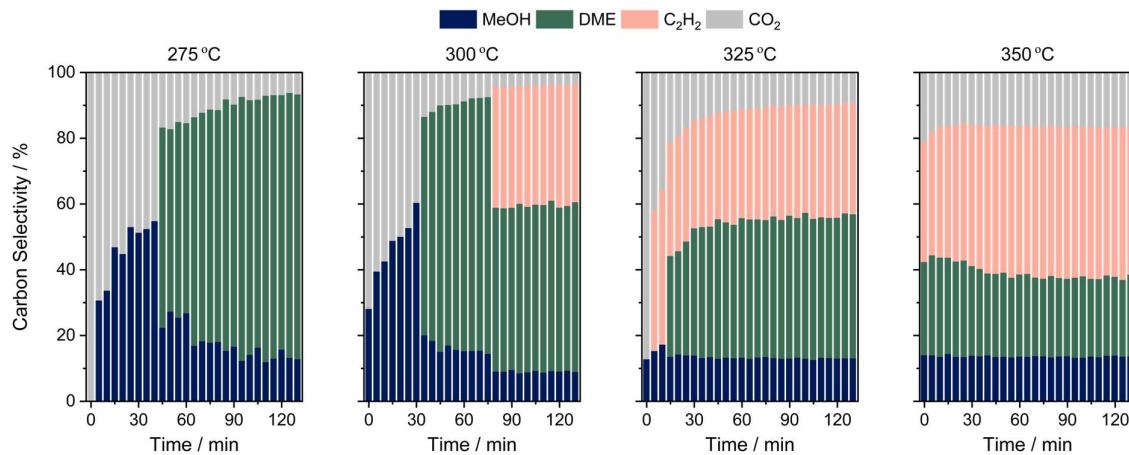

167

168

169

170 **Supplementary Figure 5.** First-order derivative of normalized absorbance and corresponding  
171 absorption edge energies for pristine Fe-CHA and upon dehydration from room temperature  
172 (RT) to 420°C. Experimental conditions: Ar flow ( $60 \text{ mL}\cdot\text{min}^{-1}$ ), temperature ramp to 420°C  
173 ( $10^\circ\text{C}\cdot\text{min}^{-1}$ ).

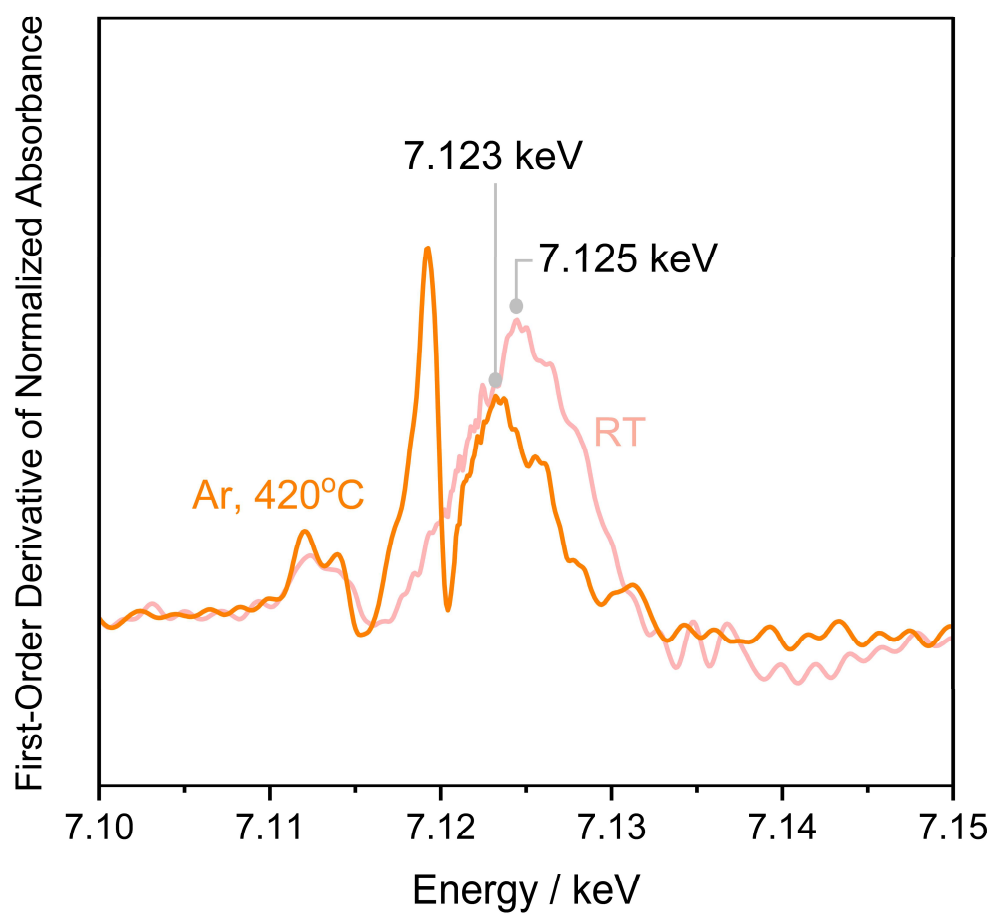

174

175

176 **Supplementary Figure 6. a**, Normalized Fe K-edge XANES spectra of reference compounds  
 177 (FeO, Fe<sub>2</sub>O<sub>3</sub>, and SrFeO<sub>3-x</sub>). **b**, Calibration of absorption energy at the normalized intensity of  
 178 0.9 versus formal Fe oxidation state. Experimental conditions: total flow rate of 60 mL·min<sup>-1</sup>,  
 179 balanced in Ar, at 275°C, sequential exposure to N<sub>2</sub>O (1 vol%) for 10 min, CH<sub>4</sub> (2 vol%) for  
 180 10 min, N<sub>2</sub>O (0.5 vol%) + CH<sub>4</sub> (1 vol%) for 20 min, and finally Ar for 5 min.

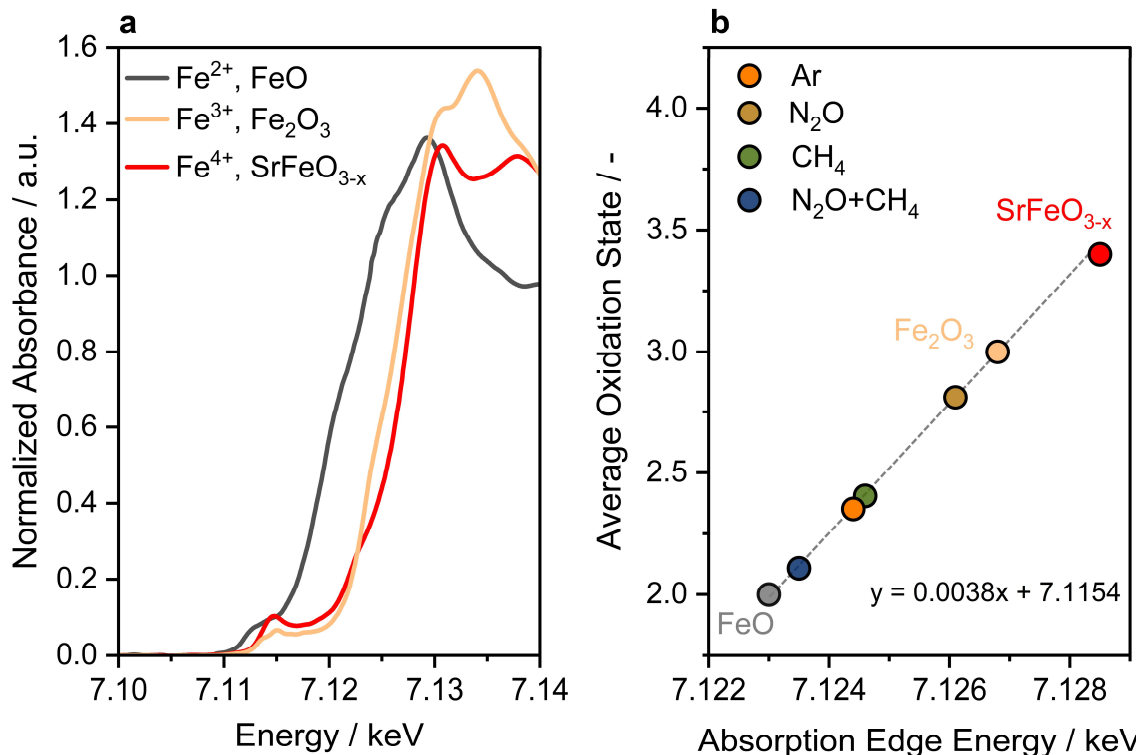

181

182 Absorption edge energies at the normalized intensity of 0.9 were plotted against formal Fe  
 183 oxidation states, in analogous to previous analysis.<sup>4,5</sup> The linear fit represents the correlation  
 184 between edge energy and average oxidations state, derived from the Fe<sup>2+</sup> and Fe<sup>3+</sup> reference  
 185 compounds.

186

187

188

189 **Supplementary Figure 7.** Evolution of the normalized ion current for the detected mass  
190 fragments  $m/z = 18$  ( $\text{H}_2\text{O}$ ) and  $m/z = 22$  (carbon fragment used to monitor  $\text{CO}_2$  formation)  
191 recorded during *operando* XAS (**Fig. 2a**) under dehydration conditions as a function of  
192 temperature. Experimental conditions: Ar flow ( $60 \text{ mL}\cdot\text{min}^{-1}$ ), temperature ramp to  $420^\circ\text{C}$   
193 ( $10^\circ\text{C}\cdot\text{min}^{-1}$ ).

194

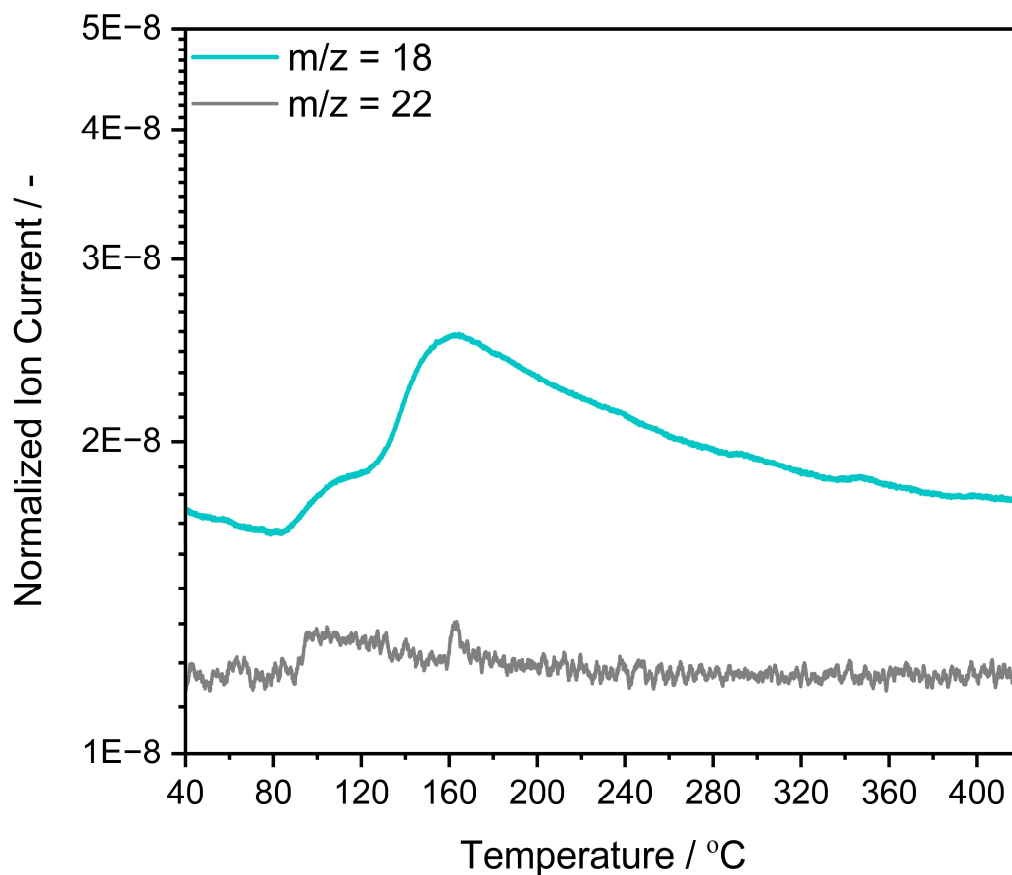

195

196

197 **Supplementary Figure 8. a**, Background-subtracted pre-edge features extracted from Fe-K $\alpha$ -  
198 HERFD-XANES for pristine Fe-CHA and upon dehydration from room temperature (RT) to  
199 420°C, along with corresponding Gaussian deconvolution fits. **b**, Pre-edge integrated intensity  
200 and centroid position of the spectra including reference compounds representative of Fe<sup>2+</sup> and  
201 Fe<sup>3+</sup> in Oh and Td coordination (**Supplementary Note 1**). Experimental conditions: Ar flow  
202 (60 mL·min<sup>-1</sup>), temperature ramp to 420°C (10°C·min<sup>-1</sup>).

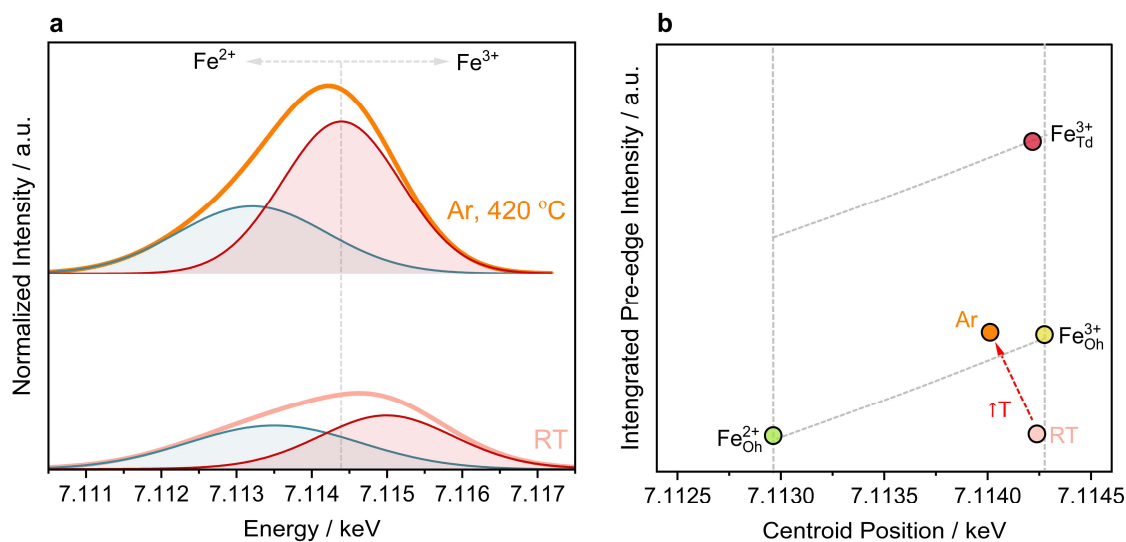

203

204

205 **Supplementary Figure 9. a**,  $1s3p$  RIXS plane of Fe-CHA after dehydration at  $420^{\circ}\text{C}$ . **b**,  
206 Contant emission energy (CEE) cuts yielding Fe K-edge-like spectra. **c**, Fe  $K\beta_{1,3}$  and  $K\beta'$   
207 resonant XES spectra collected at constant incident energies (CIE). **d**, Non-resonant Fe  $K\beta$   
208 XES spectra collected on Fe-CHA after dehydration at  $420^{\circ}\text{C}$ . Experimental conditions: Ar  
209 flow ( $60\text{ mL}\cdot\text{min}^{-1}$ ), temperature ramp to  $420^{\circ}\text{C}$  ( $10^{\circ}\text{C}\cdot\text{min}^{-1}$ ).

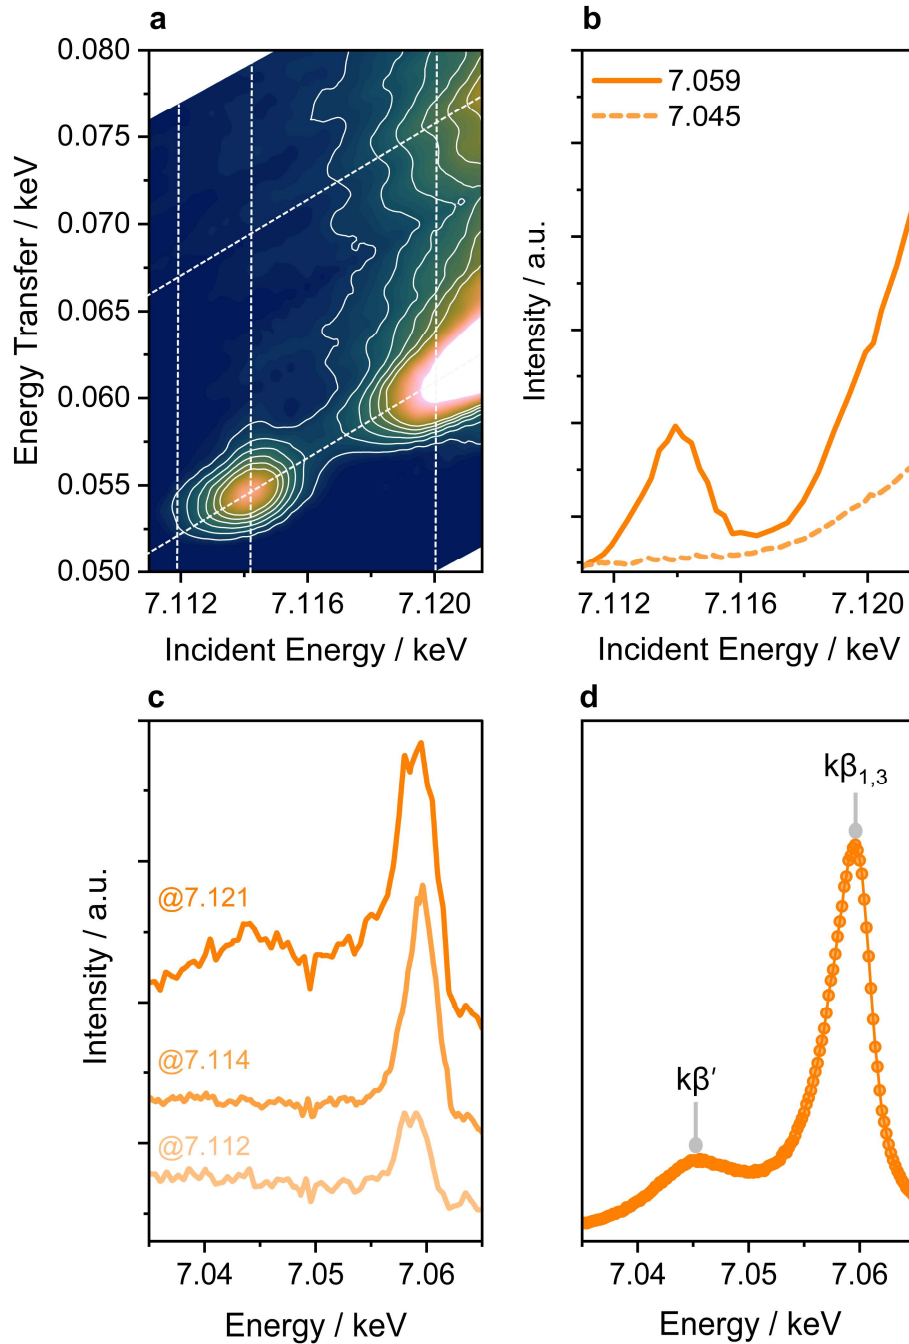

210

211

212 **Supplementary Figure 10.** Fe K $\alpha$ -HERFD-XANES of Fe-CHA in different reaction environ-  
213 nments. Experimental conditions: total flow rate of 60 mL·min<sup>-1</sup>, balanced in Ar, at 275°C, se-  
214 quential exposure to N<sub>2</sub>O (1 vol%) for 10 min, CH<sub>4</sub> (2 vol%) for 10 min, N<sub>2</sub>O (0.5 vol%) +  
215 CH<sub>4</sub> (1 vol%) for 20 min, and finally Ar for 5 min.

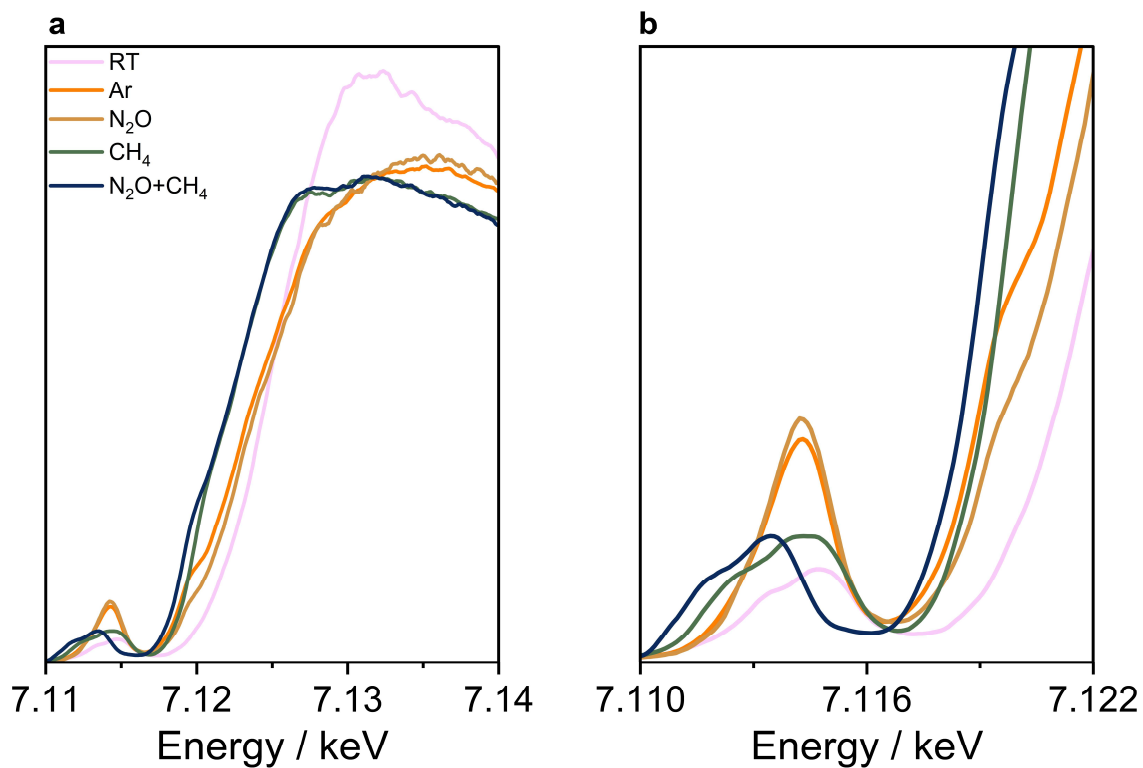

218 **Supplementary Figure 11.** Pre-edge integrated intensity and centroid position of the spectra  
 219 from background subtracted Fe K $\alpha$ -HERFD-XANES including reference compounds  
 220 representative of Fe<sup>2+</sup> and Fe<sup>3+</sup> in Oh and Td coordination (**Supplementary Note 1**).  
 221 Experimental conditions: total flow rate of 60 mL·min<sup>-1</sup>, balanced in Ar, at 275°C, sequential  
 222 exposure to N<sub>2</sub>O (1 vol%) for 10 min, CH<sub>4</sub> (2 vol%) for 10 min, N<sub>2</sub>O (0.5 vol%) + CH<sub>4</sub> (1  
 223 vol%) for 20 min, and finally Ar for 5 min.

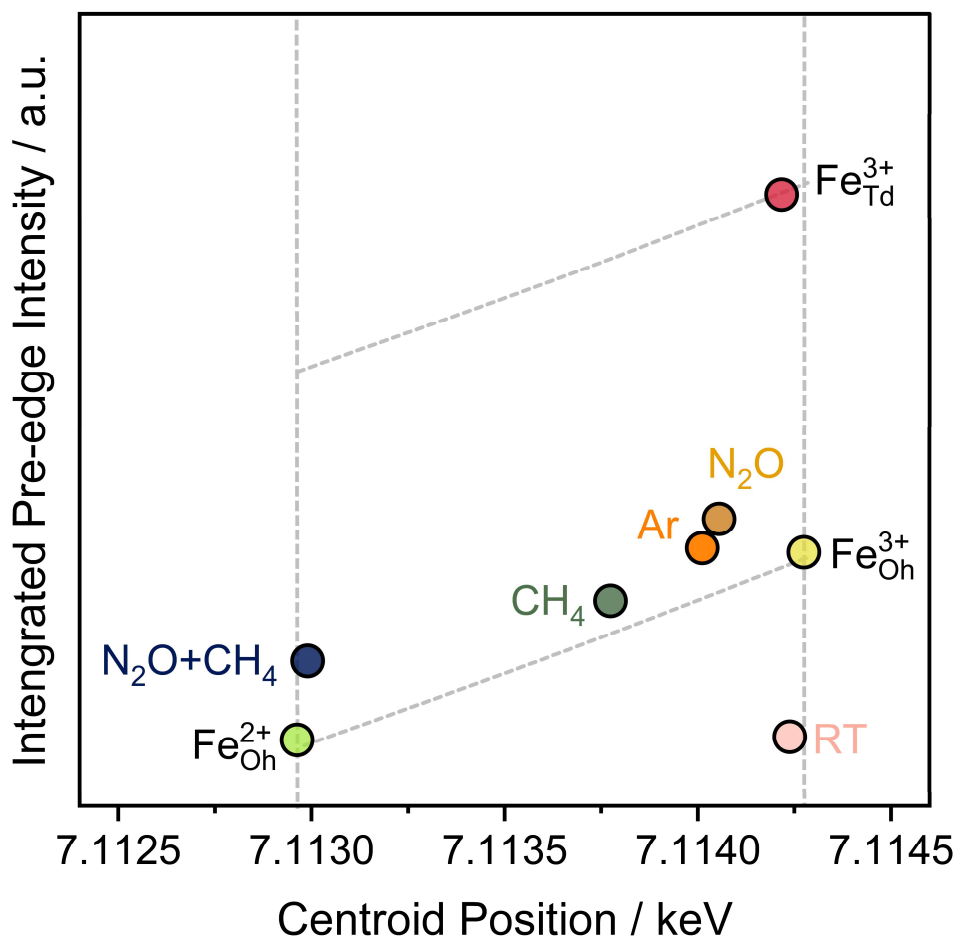

224

225 The pre-edge analysis provides an estimate of the average Fe oxidation state by exploiting the  
 226 linear correlation between the pre-edge centroid energy and the Fe oxidation state. This  
 227 correlation was calibrated using the Fe<sup>2+</sup><sub>Oh</sub> and Fe<sup>3+</sup><sub>Oh</sub> references, yielding the relationship  $y =$   
 228  $0.0013x + 7.1103$ , where  $y$  is the centroid energy and  $x$  is the formal Fe oxidation state.

229 **Supplementary Figure 12.** Bader-analysis-derived partial Fe charges vs the corresponding  
230 formal oxidation states of Fe species used as references ( $Z_2\text{Fe}^{2+}$  and  $Z_2\text{Fe}^{3+}\text{OH}$ ) and relevant in  
231  $\text{CH}_4$  hydroxylation.

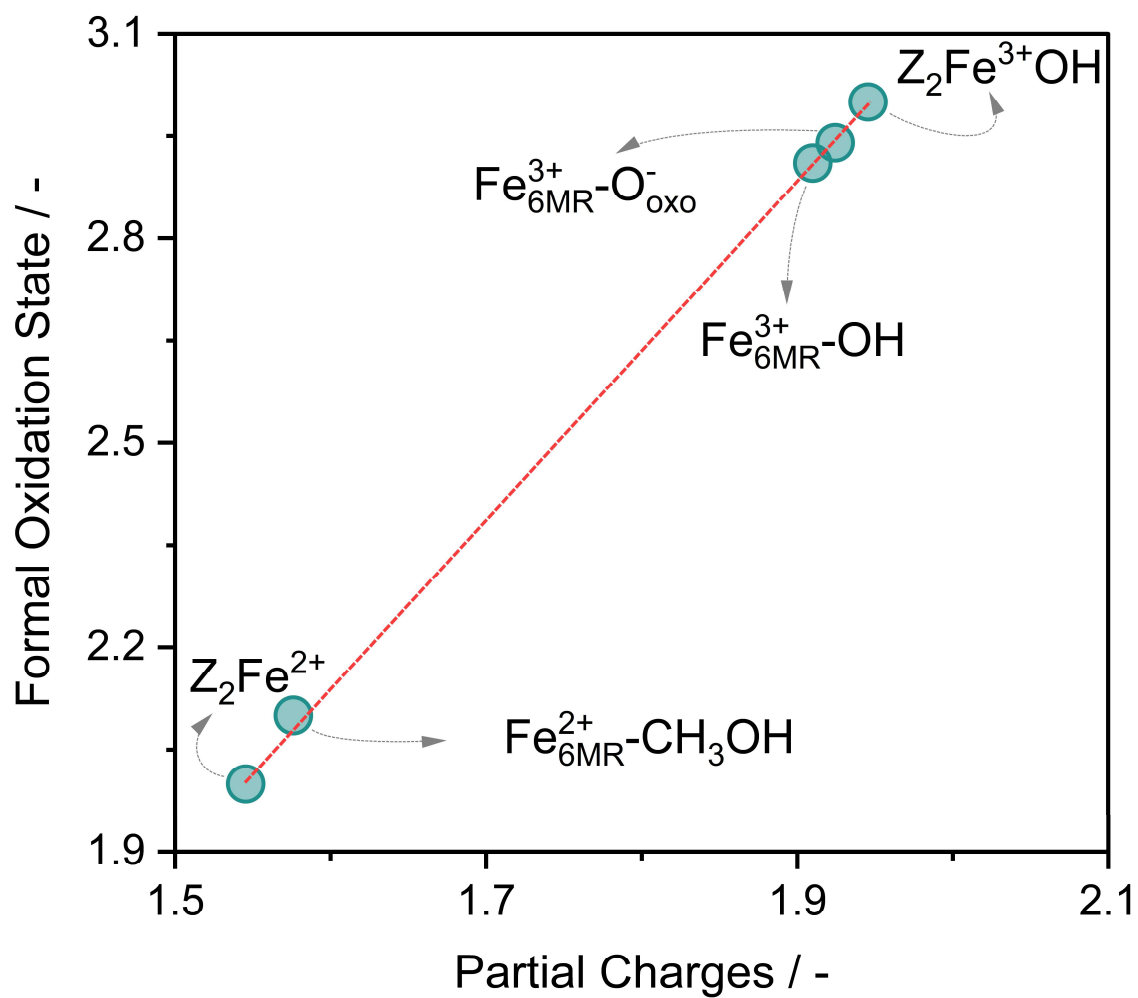

232

233

234 **Supplementary Figure 13.** Temporal evolution of the normalized ion current for the detected  
235 mass fragments  $m/z = 44$  ( $\text{N}_2\text{O}$ ),  $m/z = 28$  ( $\text{N}_2$ ), and  $m/z = 32$  ( $\text{O}_2$ ) during  $\text{N}_2\text{O}$  exposure in the  
236 *operando* XAS experiment (**Fig. 3a**). The inset highlights the transient behavior of the  $m/z =$   
237 28 signal. Experimental conditions: total flow rate of  $60 \text{ mL}\cdot\text{min}^{-1}$ , balanced in Ar, at  $275^\circ\text{C}$ ,  
238 exposure to  $\text{N}_2\text{O}$  (1 vol%) for 10 min.

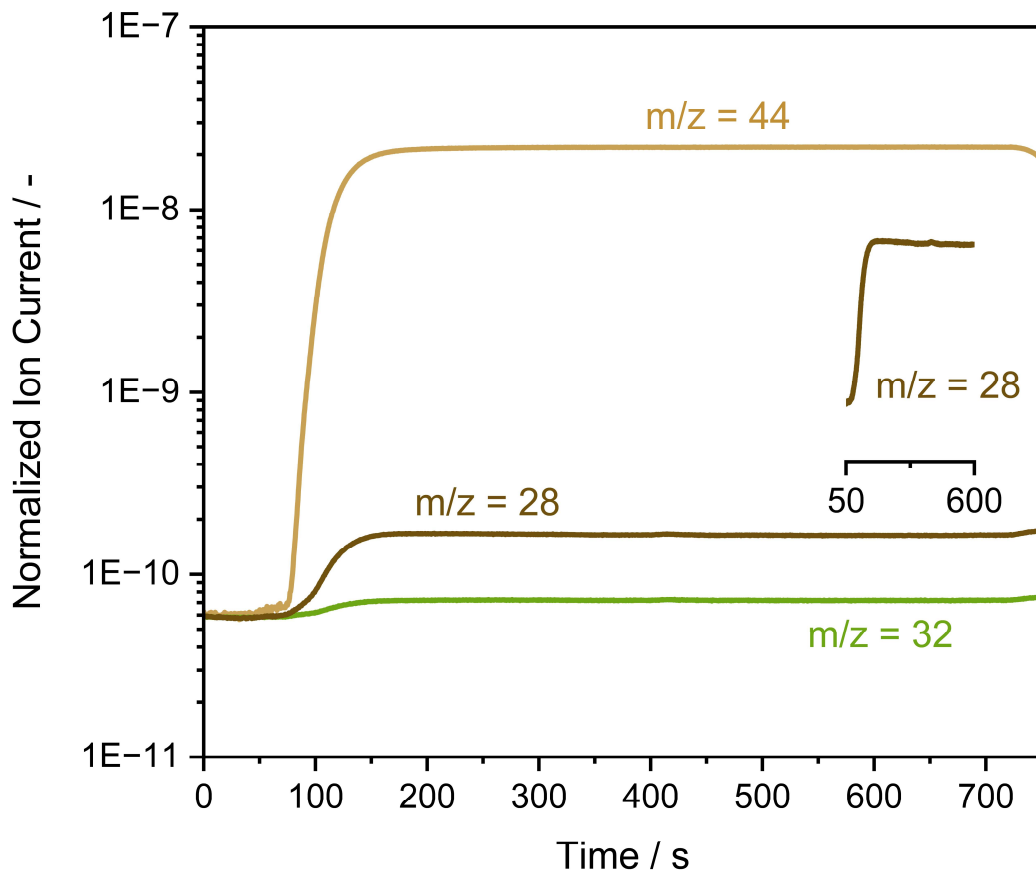

239

240

241

242

243 **Supplementary Figure 14. a**, Magnified view of the  $g' \approx 2$  region to emphasize variations in  
244 Fe-related paramagnetic signals. **b**, Differential EPR spectra obtained by subtracting the  
245 reference spectrum (as indicated). Experimental conditions: total flow rate of  $60 \text{ mL}\cdot\text{min}^{-1}$ ,  
246 balanced in Ar, at  $275^\circ\text{C}$ , sequential exposure to  $\text{N}_2\text{O}$  (1 vol%) for 10 min,  $\text{CH}_4$  (2 vol%) for  
247 10 min,  $\text{N}_2\text{O}$  (0.5 vol%) +  $\text{CH}_4$  (1 vol%) for 20 min, and finally Ar for 5 min.

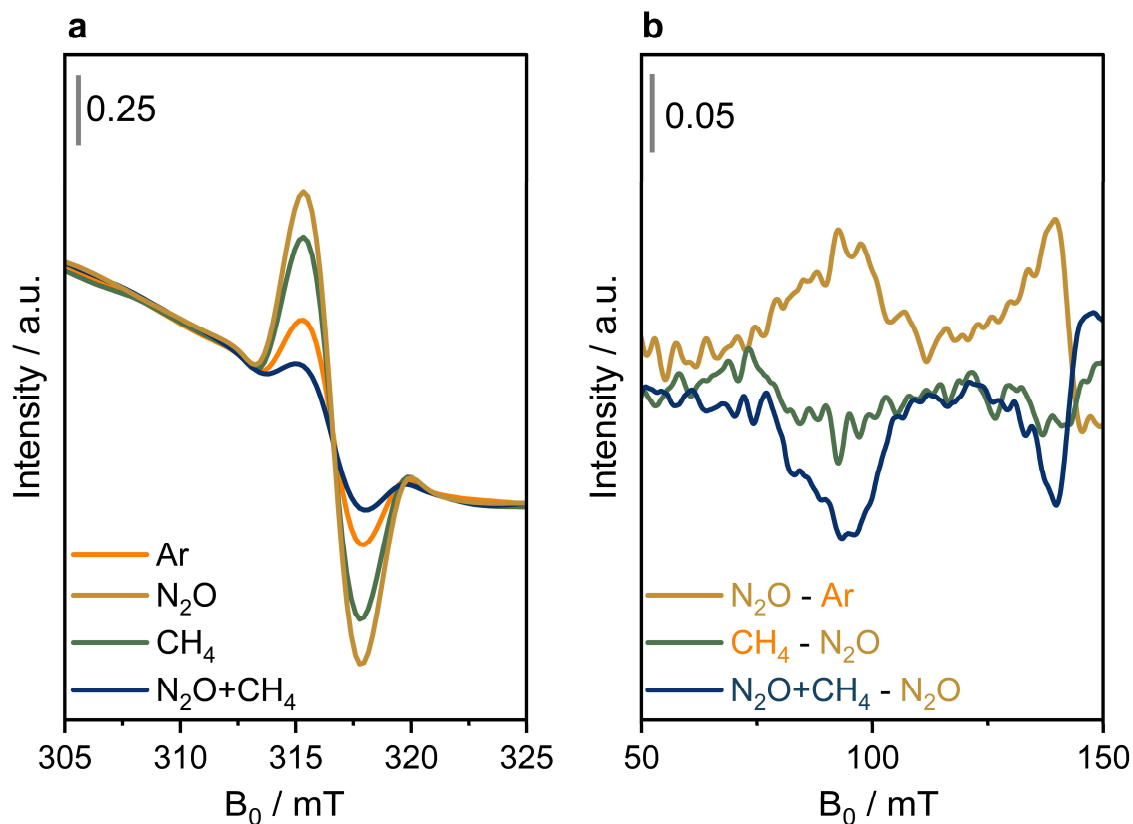

248

249

250 **Supplementary Figure 15.**  $1s3p$  RIXS planes of Fe-CHA after the Ar treatment at 420 °C and  
251 upon contact with  $N_2O$ , along with their Fe K-edge-like spectra obtained by constant emission  
252 energy (CEE) cuts. Experimental conditions: total flow rate of  $60 \text{ mL}\cdot\text{min}^{-1}$ , balanced in Ar, at  
253 275°C, exposure to  $N_2O$  (1 vol%) for 10 min.

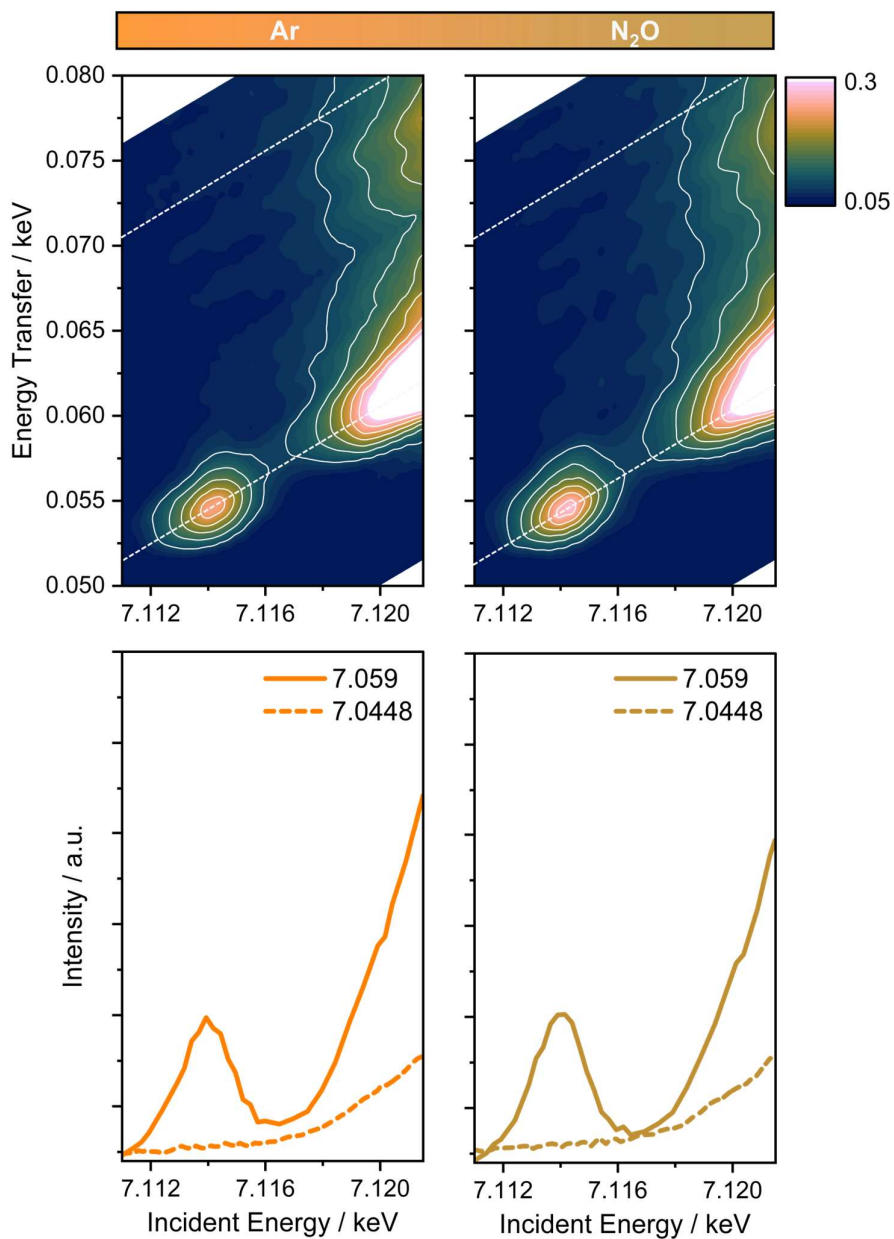

254

255

256

257 **Supplementary Figure 16.** Temporal evolution of the normalized ion current for the detected  
258 mass fragments  $m/z = 16$  ( $\text{CH}_4$ ),  $m/z = 44$  ( $\text{N}_2\text{O}$ ),  $m/z = 22$  (carbon fragment), and  $m/z = 31$   
259 ( $\text{CH}_3\text{OH}$ ), during  $\text{CH}_4$  exposure in the *operando* XAS experiment (**Fig 3a**). Experimental  
260 conditions: total flow rate of  $60 \text{ mL}\cdot\text{min}^{-1}$ , balanced in Ar, at  $275^\circ\text{C}$ , sequential exposure to  
261  $\text{N}_2\text{O}$  (1 vol%) for 10 min (shown in **Supplementary Fig. 13**) followed by  $\text{CH}_4$  (2 vol%) for 10  
262 min.

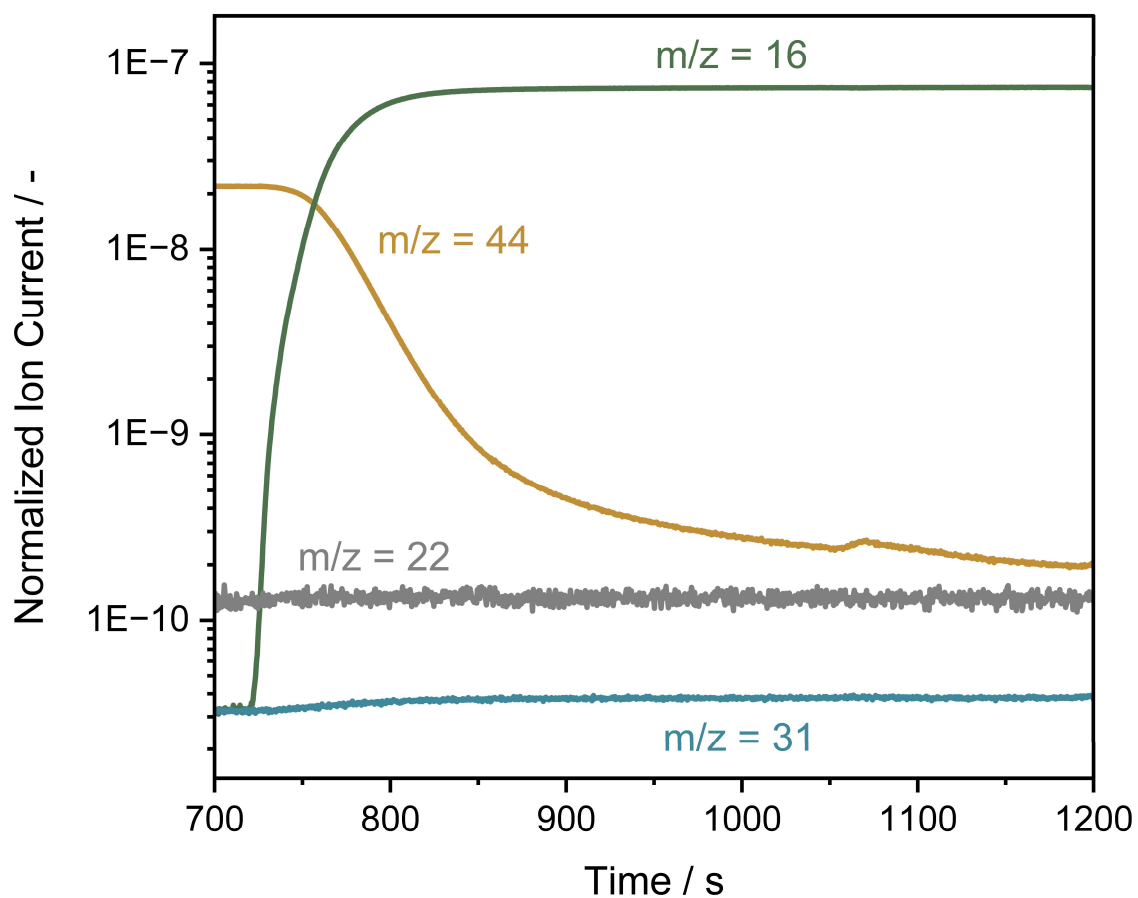

263

264 **Supplementary Figure 17.** Product distribution measured by  $\mu$ GC during the  $\text{CH}_4$ -only and  
265  $\text{N}_2\text{O} + \text{CH}_4$  co-feed steps of the *operando* DRIFTS experiments shown in **Fig. 3g**, highlighting  
266 the detectable gas-phase products. Experimental conditions: total flow rate of  $60 \text{ mL}\cdot\text{min}^{-1}$ ,  
267 balanced in Ar, at  $275^\circ\text{C}$ , sequential exposure to  $\text{N}_2\text{O}$  (1 vol%) for 10 min (not shown),  $\text{CH}_4$   
268 (2 vol%) for 10 min,  $\text{N}_2\text{O}$  (0.5 vol%) +  $\text{CH}_4$  (1 vol%) for 20 min, and finally Ar for 5 min.

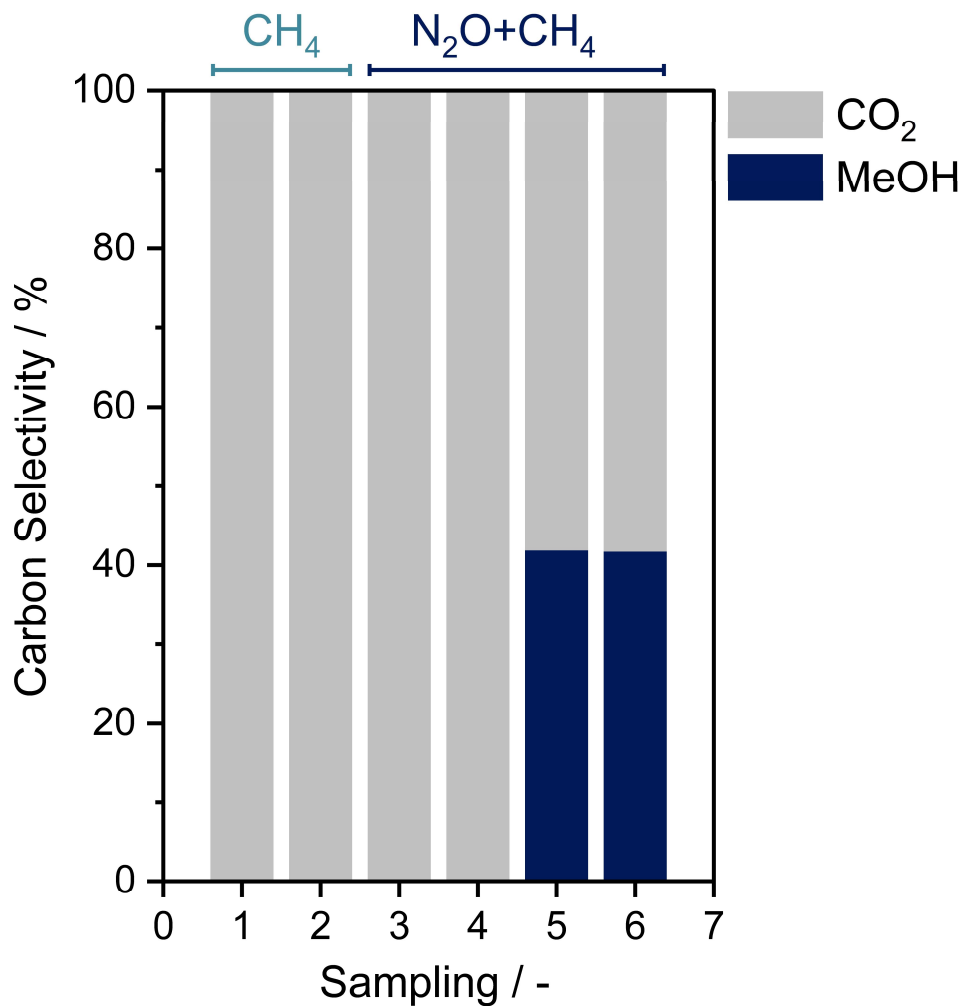

269

270

271 **Supplementary Figure 18.** Temporal evolution of the normalized ion current for the mass  
272 fragments  $m/z = 16$  ( $\text{CH}_4$ ),  $m/z = 44$  ( $\text{N}_2\text{O}$ ),  $m/z = 22$  (carbon fragment), and  $m/z = 31$   
273 ( $\text{CH}_3\text{OH}$ ), during  $\text{N}_2\text{O} + \text{CH}_4$  co-feed in the *operando* XAS experiment (**Fig. 3a**). Experimental  
274 conditions: total flow rate of  $60 \text{ mL}\cdot\text{min}^{-1}$ , balanced in Ar, at  $275^\circ\text{C}$ ,  $\text{N}_2\text{O}$  (0.5 vol%) and  $\text{CH}_4$   
275 (1 vol%) for 20 min.

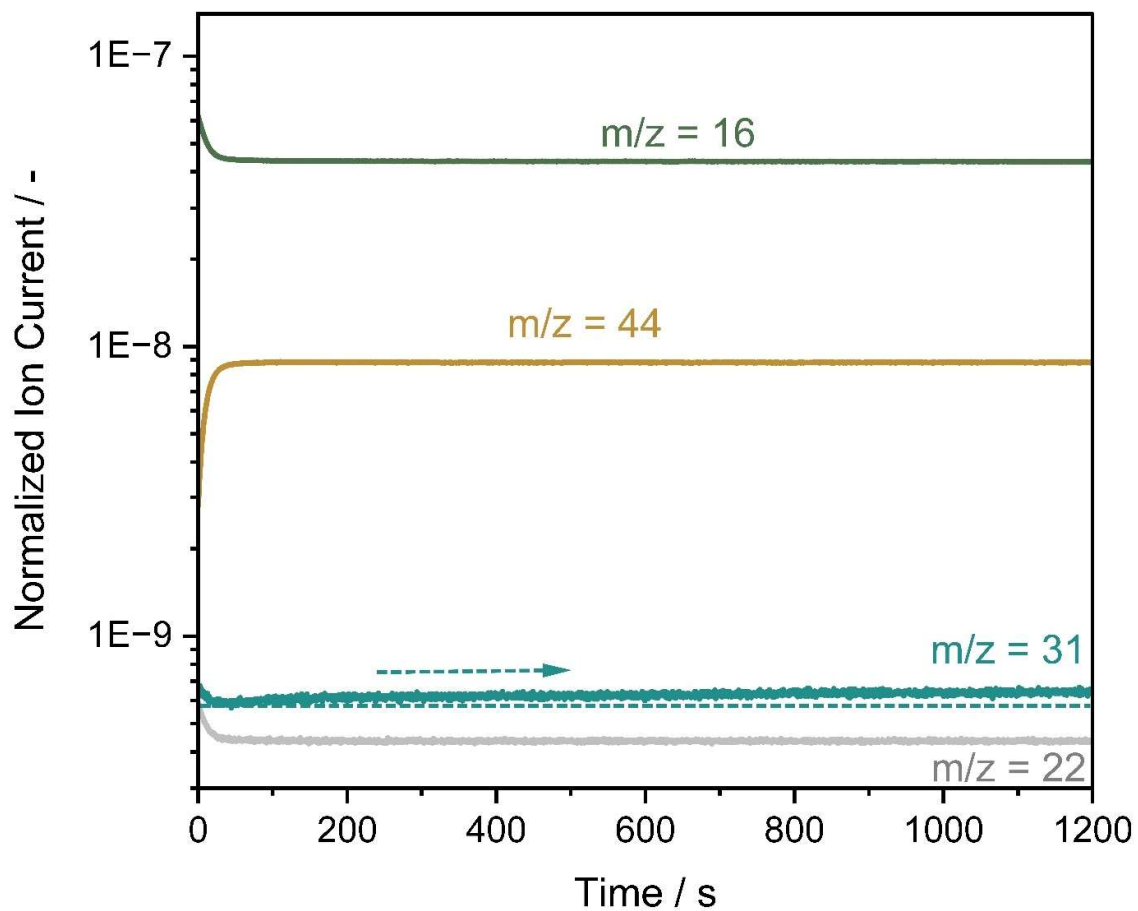

276

277

278 **Supplementary Figure 19.** Temporal evolution of the normalized ion current for the mass  
279 fragments  $m/z = 16$  ( $\text{CH}_4$ ),  $m/z = 18$  ( $\text{H}_2\text{O}$ ),  $m/z = 44$  ( $\text{N}_2\text{O}$ ),  $m/z = 22$  (carbon fragment), and  
280  $m/z = 31$  ( $\text{CH}_3\text{OH}$ ), during  $\text{N}_2\text{O} + \text{CH}_4$  co-feed in the *operando* DRIFTS experiment (**Fig. 3g**).  
281 Experimental conditions: total flow rate of  $60 \text{ mL}\cdot\text{min}^{-1}$ , balanced in Ar, at  $275^\circ\text{C}$ ,  $\text{N}_2\text{O}$  (0.5  
282 vol%) and  $\text{CH}_4$  (1 vol%) for 20 min.

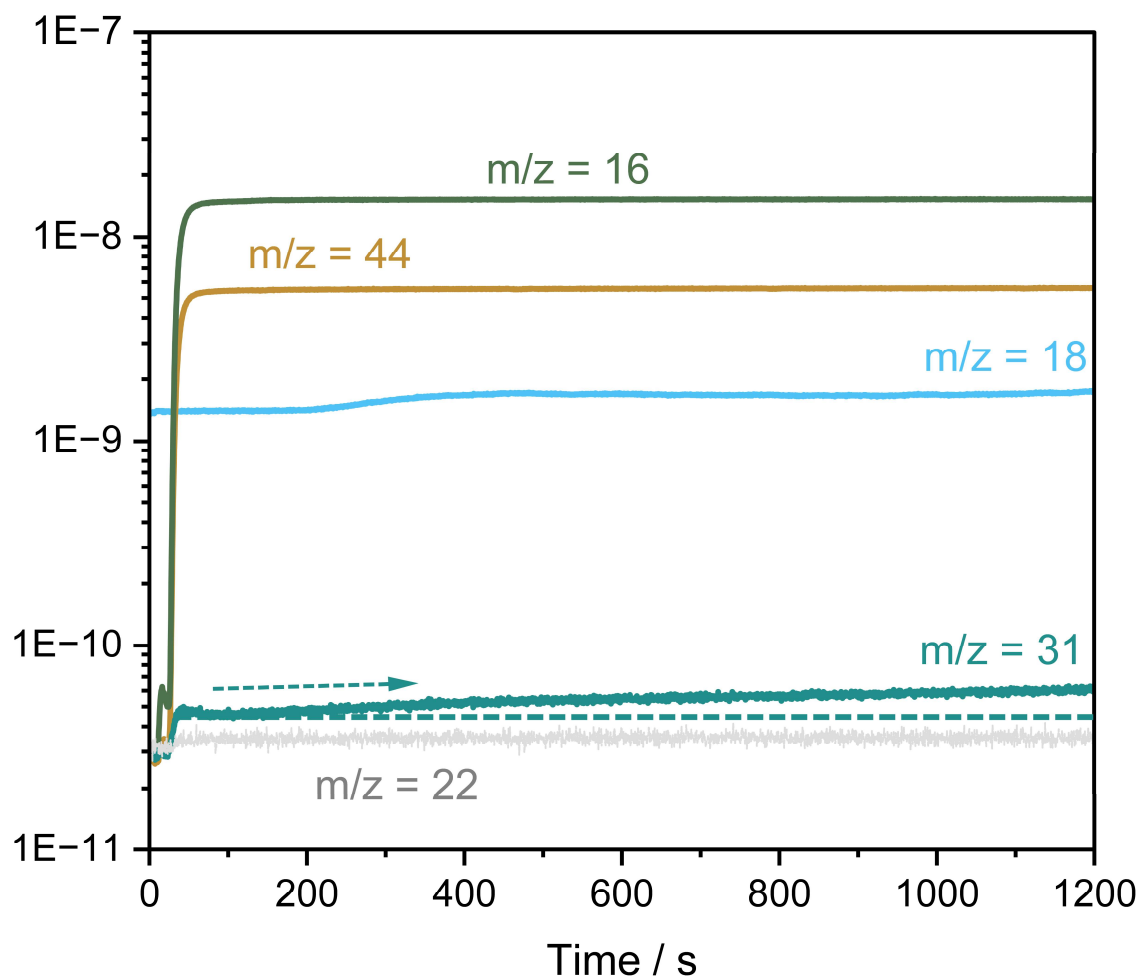

283

284

285 **Supplementary Figure 20.** Normalized intensity at fixed energy (7.1117, 7.1144, and  
286 7.1201 keV) as a function of phase angle, recorded during ME-K $\alpha$ -HERFD. Experimental  
287 conditions: total flow rate of 60 mL·min<sup>-1</sup>, balanced in Ar, at 275°C, with 10 min pulses of CH<sub>4</sub>  
288 (1 vol%) introduced into a steady flow containing N<sub>2</sub>O (0.5 vol%).

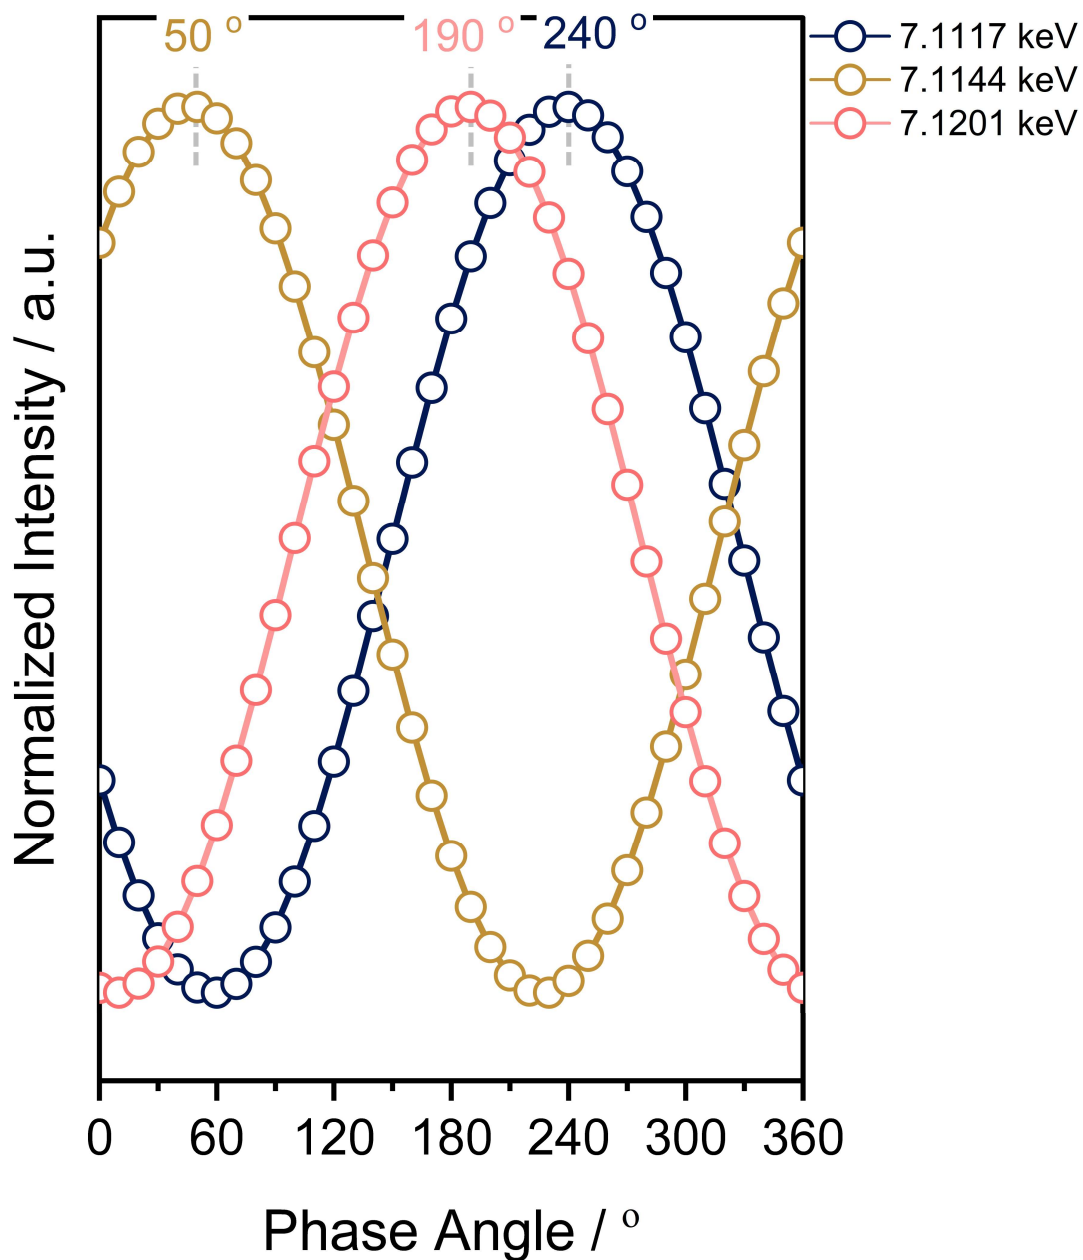

289

290

291

292 **Supplementary Figure 21.** Normalized pseudo-absorbance as a function of phase angle for  
293 selected vibrational bands at 2817, 2852, 2918, 2966, and 3662  $\text{cm}^{-1}$ , recorded during ME-  
294 DRIFTS experiments. Experimental conditions: total flow rate of  $60 \text{ mL}\cdot\text{min}^{-1}$ , balanced in Ar,  
295 at  $275^\circ\text{C}$ , with 10 min pulses of  $\text{CH}_4$  (1 vol%) introduced into a steady flow containing  $\text{N}_2\text{O}$   
296 (0.5 vol%).

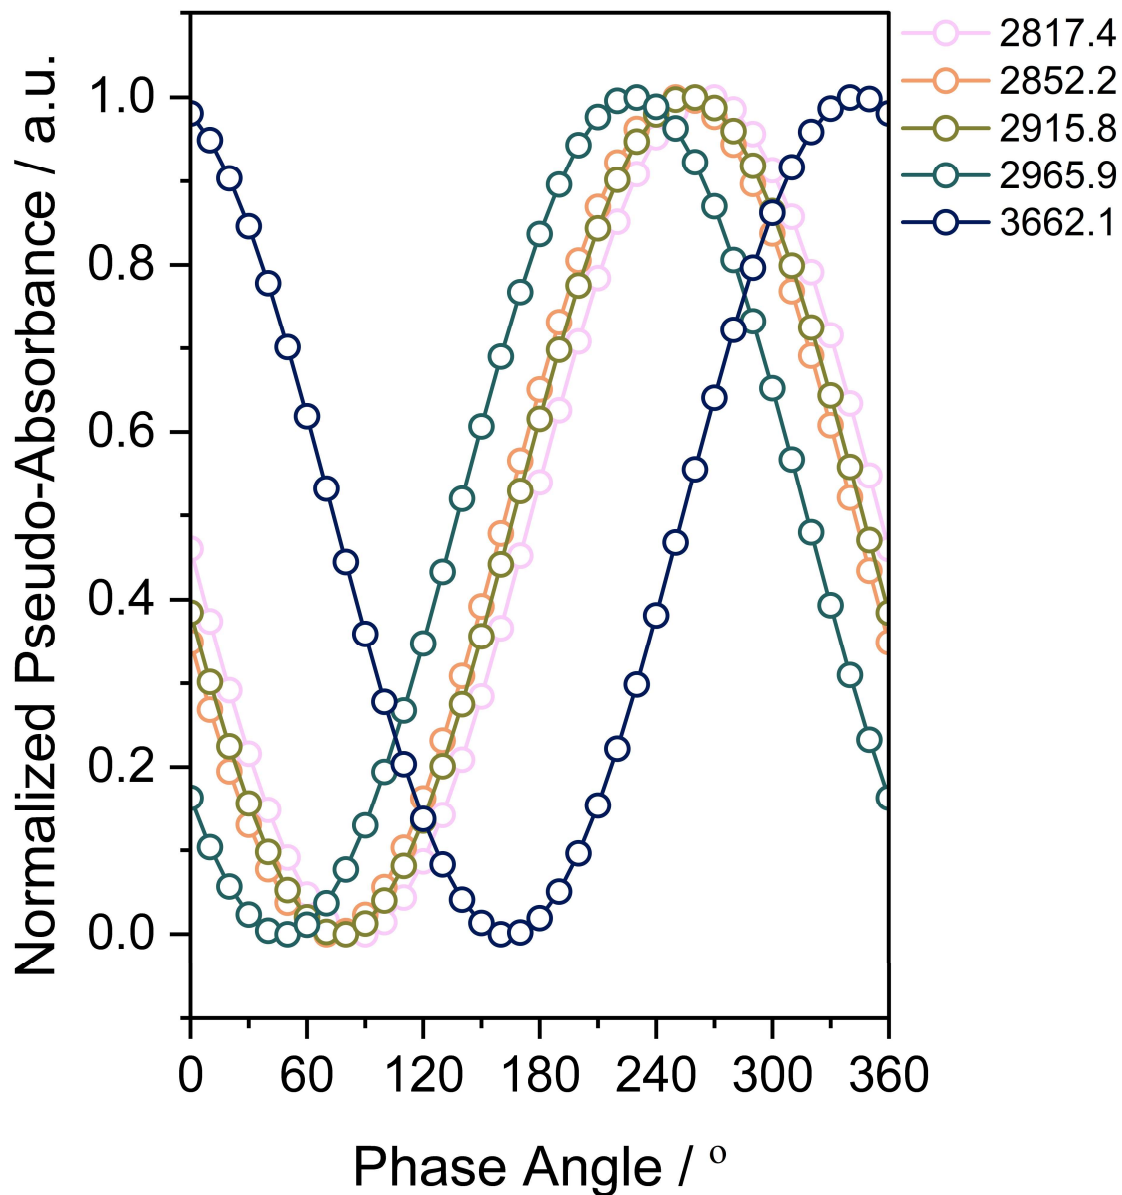

297

298

299 **Supplementary Figure 22.** Time evolution of the normalized ion currents for the detected  
300 mass fragments during the *operando* ME-DRIFTS experiment (**Fig. 4d**), showing two  
301 modulation periods. Monitored signals are  $m/z = 16$  ( $\text{CH}_4$ ),  $m/z = 18$  ( $\text{H}_2\text{O}$ ),  $m/z = 44$  ( $\text{N}_2\text{O}$ ),  
302  $m/z = 12$  (carbon fragment),  $m/z = 32$  (MeOH), and  $m/z = 31$  (MeOH), representing two of the  
303 modulation periods. Experimental conditions: total flow rate of  $60 \text{ mL}\cdot\text{min}^{-1}$ , balanced in Ar,  
304 at  $275^\circ\text{C}$ , with 10 min pulses of  $\text{CH}_4$  (1 vol%) introduced into a steady flow containing  $\text{N}_2\text{O}$   
305 (0.5 vol%).

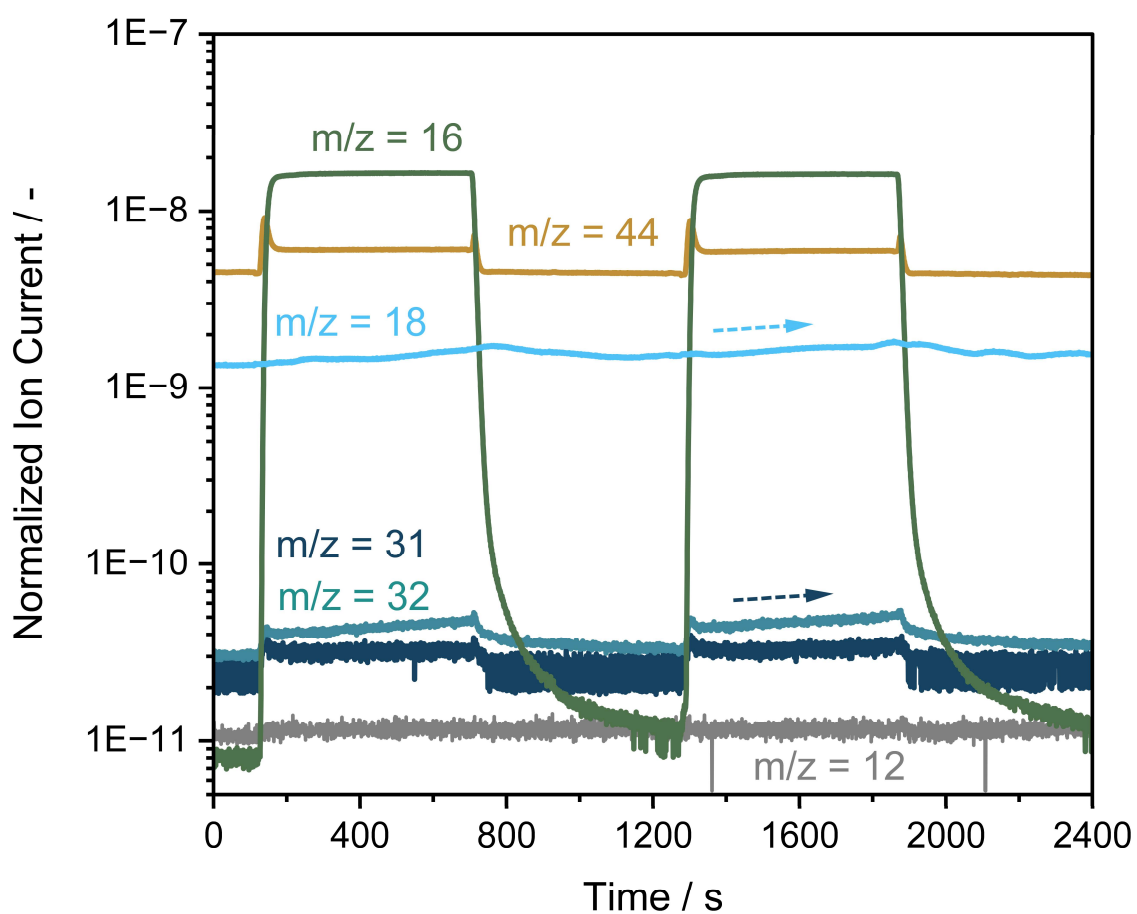

306

307

308 **Supplementary Figure 23.** Time evolution of the lack of fit, reported as the R factor (%), for  
309 the multivariate curve resolution fit of the time-resolved XANES spectra.

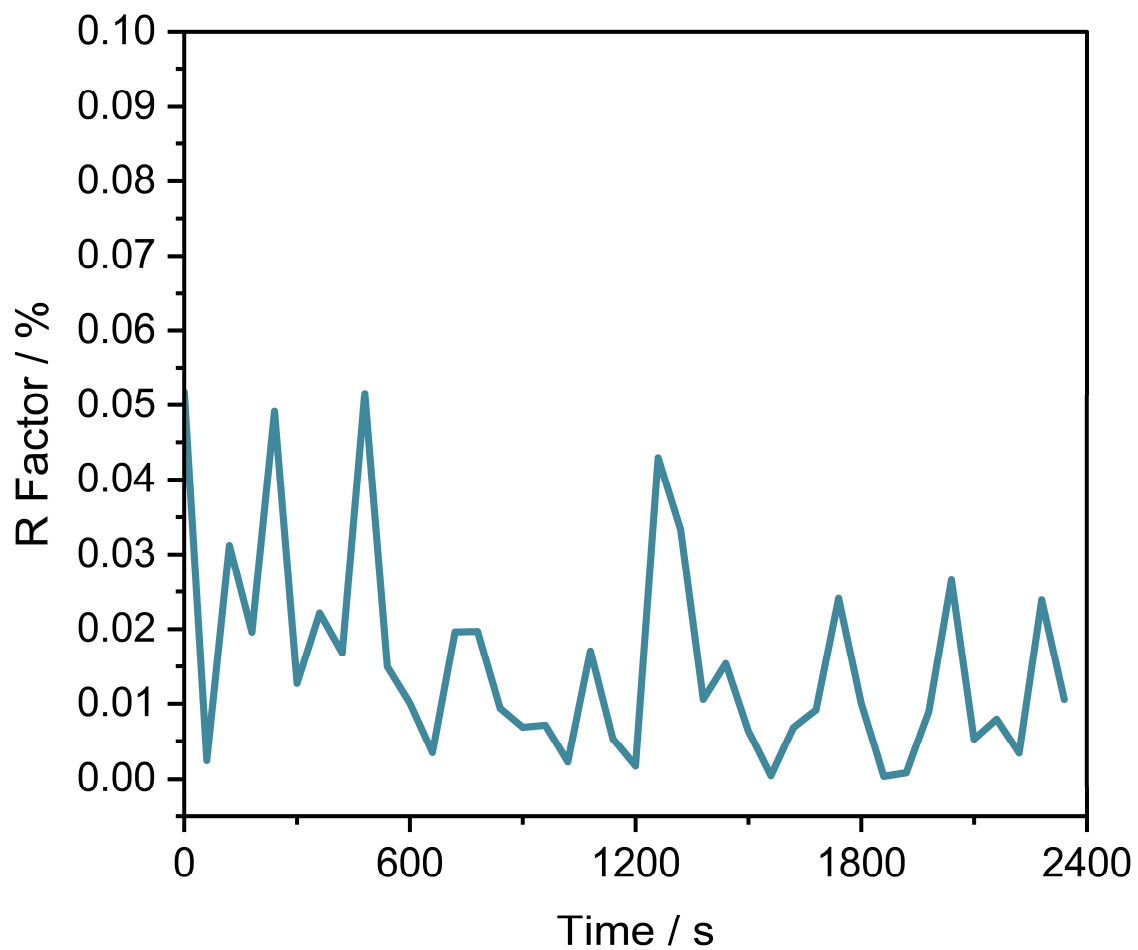

310

311

312 **Supplementary Figure 24.** Experimental protocol applied during the catalytic activity test.  
313 After thermal activation in Ar (heating to 420°C at 10 °C·min<sup>-1</sup>, then holding for 30 min), the  
314 catalyst was cooled to the reaction temperature (275 °C). The feed was then switched  
315 sequentially to N<sub>2</sub>O (30 min), CH<sub>4</sub> (30 min), and N<sub>2</sub>O + CH<sub>4</sub> (2.5 h), while maintaining constant  
316 temperature.

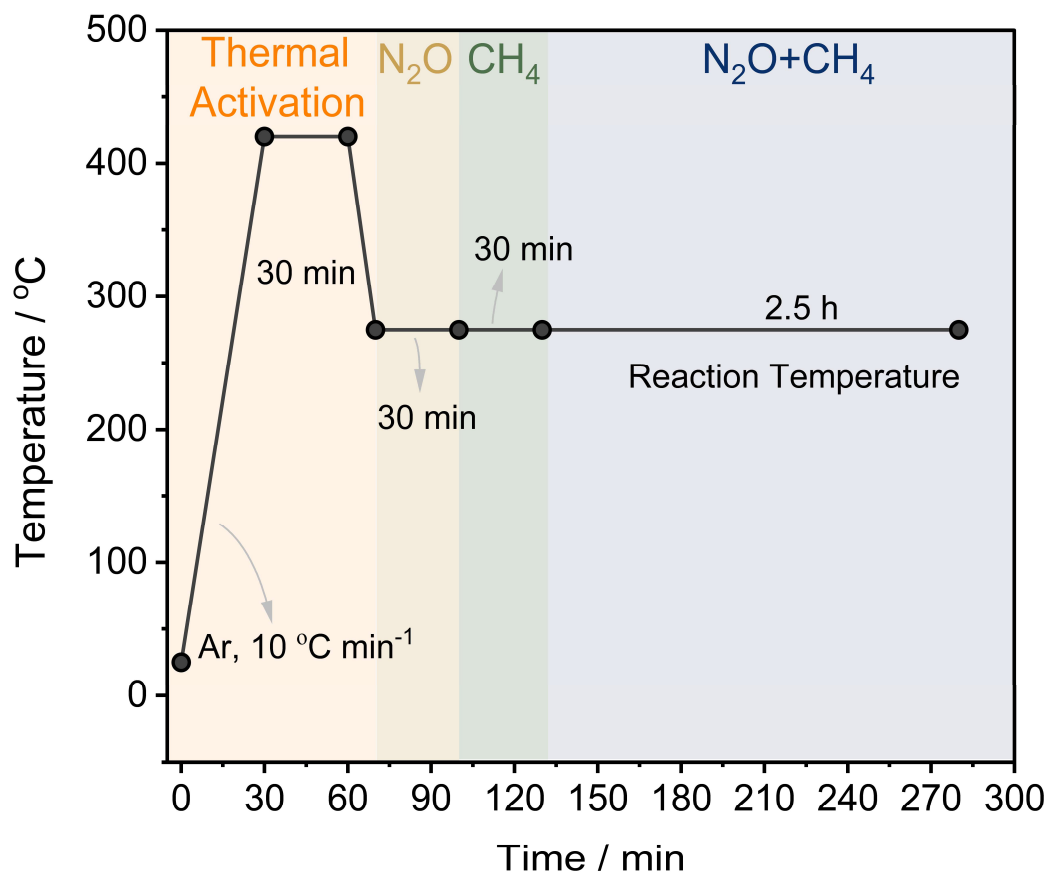

317

318

319

320 **Supplementary Figure 25.** Protocols used for the transient and modulated excitation (ME)  
321 spectroscopic experiments. Top: The catalyst was activated in Ar ( $10^{\circ}\text{C}\cdot\text{min}^{-1}$  to  $420^{\circ}\text{C}$ , 30  
322 min), cooled to  $275^{\circ}\text{C}$ , and then exposed to  $\text{N}_2\text{O}$  (10 min),  $\text{CH}_4$  (10 min),  $\text{N}_2\text{O} + \text{CH}_4$  (20 min),  
323 and Ar (5 min). Bottom: During ME,  $\text{N}_2\text{O}$  was held constant at 0.5 vol%, while  $\text{CH}_4$  was  
324 switched between 0 and 1 vol% every 10 min over n cycles, followed by Ar.

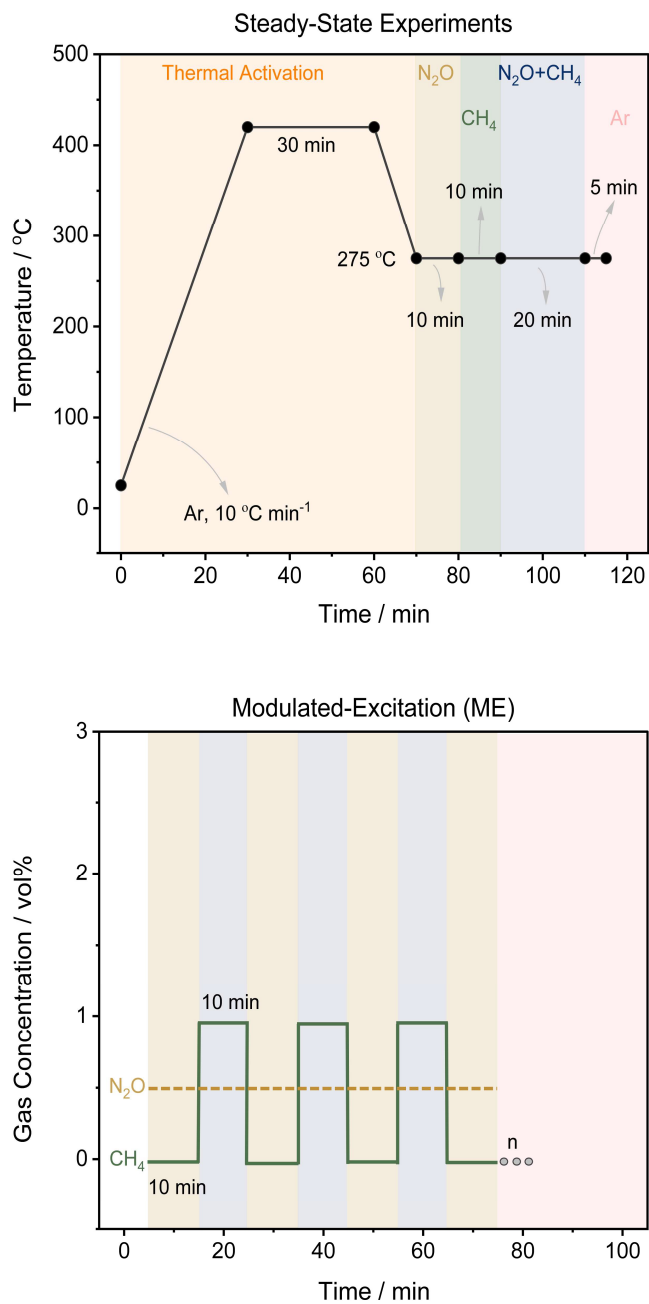

325

326 **Supplementary Figure 26.** Hexagonal CHA unit cells with two Al substitutions in the same  
327 6MR and exchanged **a**,  $\text{Fe}^{2+}$  ( $\text{Z}_2\text{Fe}^{2+}$ ) and **b**,  $\text{Fe}^{3+}\text{OH}$  ( $\text{Z}_2\text{Fe}^{3+}\text{OH}$ ). Yellow: Si; red: O; magenta:  
328 Al; white: H; and gray: Fe.

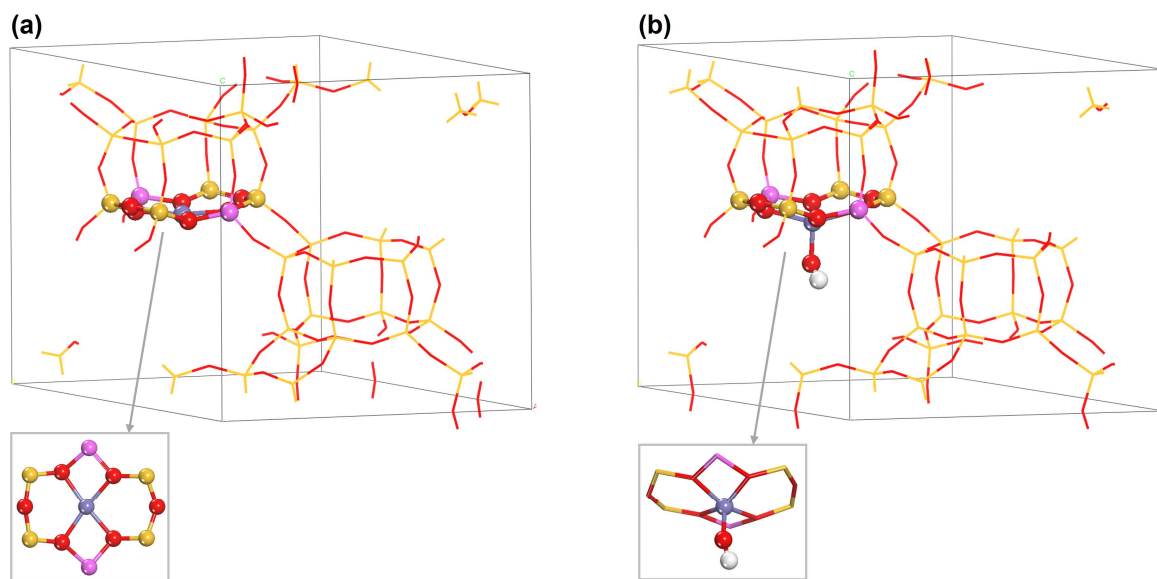

329

330

331

## 332 **Supplementary References**

333

334 1. Wilke M, Farges Fo, Petit P-E, Brown GE, Jr., Martin Fo. Oxidation state and coordination  
335 of Fe in minerals: An Fe K-XANES spectroscopic study. *Am. Mineral.* **86**, 714–730  
336 (2001).

337

338 2. Boubnov A, Carvalho HWP, Doronkin DE, Günter T, Gallo E, Atkins AJ, et al. Selective  
339 Catalytic Reduction of NO Over Fe-ZSM-5: Mechanistic Insights by Operando HERFD-  
340 XANES and Valence-to-Core X-ray Emission Spectroscopy. *J. Am. Chem. Soc.* **136**,  
341 13006–13015 (2014).

342

343 3. Westre TE, Kennepohl P, DeWitt JG, Hedman B, Hodgson KO, Solomon EI. A Multiplet  
344 Analysis of Fe K-Edge  $1s \rightarrow 3d$  Pre-Edge Features of Iron Complexes. *J. Am. Chem. Soc.*  
345 **119**, 6297–6314 (1997).

346

347 4. Simons MC, Prinslow SD, Babucci M, Hoffman AS, Hong J, Vitillo JG, et al. Beyond  
348 Radical Rebound: Methane Oxidation to Methanol Catalyzed by Iron Species in Metal–  
349 Organic Framework Nodes. *J. Am. Chem. Soc.* **143**, 12165–12174 (2021).

350

351 5. Simons MC, Vitillo JG, Babucci M, Hoffman AS, Boubnov A, Beauvais ML, et al.  
352 Structure, Dynamics, and Reactivity for Light Alkane Oxidation of Fe(II) Sites Situated in  
353 the Nodes of a Metal–Organic Framework. *J. Am. Chem. Soc.* **141**, 18142–18151 (2019).

354

355 6. C. Baerlocher, McCusker L. Database of Zeolite Structures. Available from:  
356 <https://www.iza-structure.org/databases/>

357

358 7. Bols ML, Hallaert SD, Snyder BER, Devos J, Plessers D, Rhoda HM, et al. Spectroscopic  
359 Identification of the  $\alpha$ -Fe/ $\alpha$ -O Active Site in Fe-CHA Zeolite for the Low-  
360 Temperature Activation of the Methane C-H Bond. *J. Am. Chem. Soc.* **140**, 12021–12032  
361 (2018).

362

- 363 8. Snyder BER, Bols ML, Rhoda HM, Plessers D, Schoonheydt RA, Sels BF, et al. Cage  
364 effects control the mechanism of methane hydroxylation in zeolites. *Science* **373**, 327–331  
365 (2021).  
366
- 367 9. Kresse G, Furthmuller J. Efficient iterative schemes for ab initio total-energy calculations  
368 using a plane-wave basis set. *Phys. Rev. B* **54**, 11169–11186 (1996).  
369
- 370 10. Kresse G, Joubert D. From ultrasoft pseudopotentials to the projector augmented-wave  
371 method. *Phys. Rev. B* **59**, 1758–1775 (1999).  
372
- 373 11. Perdew JP, Burke K, Ernzerhof M. Generalized gradient approximation made simple.  
374 *Phys. Rev. Lett.* **77**, 3865–3868 (1996).  
375
- 376 12. Meng Y, Liu XW, Huo CF, Guo WP, Cao DB, Peng Q, et al. When Density Functional  
377 Approximations Meet Iron Oxides. *J. Chem. Theory Comput.* **12**, 5132–5144 (2016).  
378
- 379 13. Dudarev SL, Botton GA, Savrasov SY, Humphreys CJ, Sutton AP. Electron-energy-loss  
380 spectra and the structural stability of nickel oxide: An LSDA+U study. *Phys. Rev. B* **57**,  
381 1505–1509 (1998).  
382
- 383 14. Heyd J, Scuseria GE, Ernzerhof M. Hybrid functionals based on a screened Coulomb  
384 potential. *J. Chem. Phys.* **118**, 8207–8215 (2003).  
385
- 386 15. Heyd J, Scuseria GE. Efficient hybrid density functional calculations in solids: assessment  
387 of the Heyd-Scuseria-Ernzerhof screened Coulomb hybrid functional. *J. Chem. Phys.* **121**,  
388 1187–1192 (2004).  
389
- 390 16. Heyd J, Scuseria GE, Ernzerhof M. Hybrid functionals based on a screened Coulomb  
391 potential (vol 118, pg 8207, 2003). *J. Chem. Phys.* **124** (2006).  
392
- 393 17. Li S, Wang Y, Wu T, Schneider WF. First-Principles Analysis of Site- and Condition-  
394 Dependent Fe Speciation in SSZ-13 and Implications for Catalyst Optimization. *ACS*  
395 *Catal.* **8**, 10119–10130 (2018).

- 396 18. Grimme S, Antony J, Ehrlich S, Krieg H. A consistent and accurate ab initio  
397 parametrization of density functional dispersion correction (DFT-D) for the 94 elements  
398 H-Pu. *J. Chem. Phys.* **132**, 154104 (2010).  
399
- 400 19. Grimme S, Ehrlich S, Goerigk L. Effect of the damping function in dispersion corrected  
401 density functional theory. *J. Comput. Chem.* **32**, 1456–1465 (2011).  
402
- 403 20. Henkelman G, Arnaldsson A, Jonsson H. A fast and robust algorithm for Bader  
404 decomposition of charge density. *Comput. Mater. Sci.* **36**, 354–360 (2006).  
405
- 406 21. Sanville E, Kenny SD, Smith R, Henkelman G. Improved grid-based algorithm for Bader  
407 charge allocation. *J. Comput. Chem.* **28**, 899–908 (2007).  
408
- 409 22. Tang W, Sanville E, Henkelman G. A grid-based Bader analysis algorithm without lattice  
410 bias. *J. Phys.: Condens. Matter* **21**, 084204 (2009).  
411
- 412 23. Chen L, Janssens TVW, Vennestrøm PNR, Jansson J, Skoglundh M, Grönbeck H. A  
413 Complete Multisite Reaction Mechanism for Low-Temperature NH<sub>3</sub>-SCR over Cu-CHA.  
414 *ACS Catal.* **10**, 5646–5656 (2020).  
415
- 416 24. Cramer CJ. *Essentials of computational chemistry: theories and models*, 2nd edn. Wiley:  
417 Chichester, West Sussex, England; Hoboken, NJ, 2004.  
418
- 419 25. Kwon S, Deshlahra P, Iglesia E. Reactivity and selectivity descriptors of dioxygen  
420 activation routes on metal oxides. *J. Catal.* **377**, 692–710 (2019).  
421
- 422 26. Kwon S, Lin TC, Iglesia E. Elementary steps and site requirements in formic acid  
423 dehydration reactions on anatase and rutile TiO<sub>2</sub> surfaces. *J. Catal.* **383**, 60–76 (2020).  
424
- 425 27. Hu W, Iacobone U, Gramigni F, Zhang Y, Wang X, Liu S, et al. Unraveling the Hydrolysis  
426 of Z<sub>2</sub>Cu<sup>2+</sup> to ZCu<sup>2+</sup>(OH)<sup>-</sup> and Its Consequences for the Low-Temperature Selective  
427 Catalytic Reduction of NO on Cu-CHA Catalysts. *ACS Catal.* **11**, 11616–11625 (2021).  
428

- 429 28. Hu W, Selleri T, Gramigni F, Fenes E, Rout KR, Liu S, et al. On the Redox Mechanism of  
430 Low-Temperature NH<sub>3</sub>-SCR over Cu-CHA: A Combined Experimental and Theoretical  
431 Study of the Reduction Half Cycle. *Angew. Chem. Int. Ed.* **60**, 7197–7204 (2021).
- 432  
433 29. Paolucci C, Parekh AA, Khurana I, Di Iorio JR, Li H, Albarracin Caballero JD, et al.  
434 Catalysis in a Cage: Condition-Dependent Speciation and Dynamics of Exchanged Cu  
435 Cations in SSZ-13 Zeolites. *J. Am. Chem. Soc.* **138**, 6028–6048 (2016).
- 436  
437 30. Henkelman G, Jonsson H. Improved tangent estimate in the nudged elastic band method  
438 for finding minimum energy paths and saddle points. *J. Chem. Phys.* **113**, 9978–9985  
439 (2000).
- 440  
441 31. Henkelman G, Jonsson H. A dimer method for finding saddle points on high dimensional  
442 potential surfaces using only first derivatives. *J. Chem. Phys.* **111**, 7010–7022 (1999).
- 443  
444 32. Xiao P, Nakamura K, Lu Y, Huang J, Wang L, Osuga R, et al. One-Pot Synthesized Fe-  
445 AEI Zeolite Catalysts Contribute to Direct Oxidation of Methane. *ACS Catal.* **13**, 16168–  
446 16178 (2023).
- 447  
448 33. Gokce I, Ozbek MO, Ipek B. Conditions for higher methanol selectivity for partial CH<sub>4</sub>  
449 oxidation over Fe-MOR using N<sub>2</sub>O as the oxidant and comparison to Fe-SSZ-13, Fe-SSZ-  
450 39, Fe-FER, and Fe-ZSM-5. *J. Catal.* **427**, 115113 (2023).
- 451  
452 34. Zhao G, Benhelal E, Adesina A, Kennedy E, Stockenhuber M. Comparison of Direct,  
453 Selective Oxidation of Methane by N<sub>2</sub>O over Fe-ZSM-5, Fe-Beta, and Fe-FER Catalysts.  
454 *J. Phys. Chem. C* **123**, 27436–27447 (2019).
- 455  
456 35. Chow YK, Dummer NF, Carter JH, Williams C, Shaw G, Willock DJ, et al. Investigating  
457 the influence of acid sites in continuous methane oxidation with N<sub>2</sub>O over Fe/MFI  
458 zeolites. *Catal. Sci. Technol.* **8**, 154–163 (2018).
- 459  
460 36. Parfenov MV, Starokon EV, Pirutko LV, Panov GI. Quasicatalytic and catalytic oxidation  
461 of methane to methanol by nitrous oxide over FeZSM-5 zeolite. *J. Catal.* **318**, 14–21  
462 (2014).
- 463

- 464 37. Cano-Blanco DC, Fischer JWA, Buttignol F, Alxneit I, Jeschke G, Kröcher O, et al.  
465 Monomeric Fe in Six-Membered Rings at Work: Operando Spectroscopy of Nitrous Oxide  
466 Activation and Decomposition over Fe-Exchanged Zeolites. *ACS Catal.* **15**, 15579–15595  
467 (2025).
- 468  
469 38. Fischer JWA, Cano-Blanco DC, Karas H, Buttignol F, Kröcher O, Ferri D, et al.  
470 Disentangling Site-Selective Redox Couples for N<sub>2</sub>O Activation on Fe-Exchanged SSZ-  
471 13 Using Modulated Excitation Operando EPR Spectroscopy. *ChemCatChem* **18**, e01575  
472 (2026).
